# Supplementary material for: Direct use of formamides as amino group sources via C–N bond cleavage: a catalytic oxidative synthesis of α-ketoamides from acetophenones and formamides under metal-free conditions
Source: Royal Society of Chemistry journal article supplement (doi:10.1039/c3ob27433k), 2013-01-01

Supplementary Material (ESI) for Organic & Biomolecular Chemistry

This journal is (c) The Royal Society of Chemistry 2012

# Direct use of formamides as amino group sources via C–N bond cleavage: A catalytic oxidative synthesis of $\alpha$ -ketoamides from acetophenones and formamides under metal-free conditions

Qiong Zhao,<sup>a</sup> Tao Miao,<sup>a</sup> Xiaobin Zhang,<sup>a</sup> Wei Zhou,<sup>a</sup> and Lei Wang\*<sup>a,b</sup>

<sup>a</sup> Department of Chemistry, Huaibei Normal University, Huaibei, Anhui 235000, P. R. China  
Tel: + 86-561-3802-069 Fax: + 86-561-3090-518  
E-mail: leiwang@chnu.edu.cn

<sup>b</sup> State Key Laboratory of Organometallic Chemistry, Shanghai Institute of Organic Chemistry, Chinese Academy of Sciences, Shanghai 200032, P R China

## *Table of Contents for Supporting Information*

|                                                                        |   |
|------------------------------------------------------------------------|---|
| 1. Effect of TEMPO on the reaction (Table S1).....                     | 2 |
| 2. FT-IR analysis of the resulting gas (Figure S1).....                | 2 |
| 3. <sup>1</sup> H and <sup>13</sup> C NMR spectra of the products..... | 3 |

## 1. Effect of TEMPO on the reaction (Table S1)

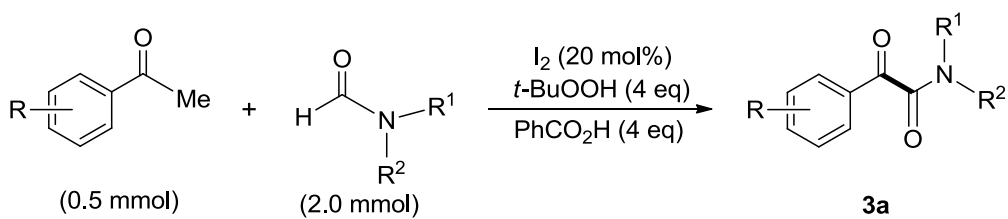

| Addition of TEMPO | <b>3a</b> , Isolated yield (%) |
|-------------------|--------------------------------|
| 0%                | 71%                            |
| 10 mol%           | 68%                            |
| 20 mol%           | 59%                            |
| 50 mol%           | 43%                            |
| 1 eq (0.5mmol)    | 19%                            |
| 2 eq (1.0mmol)    | trace                          |
| 3 eq (2.0mmol)    | 0                              |

## 2. FT-IR analysis of the resulting gas (Figure S1)

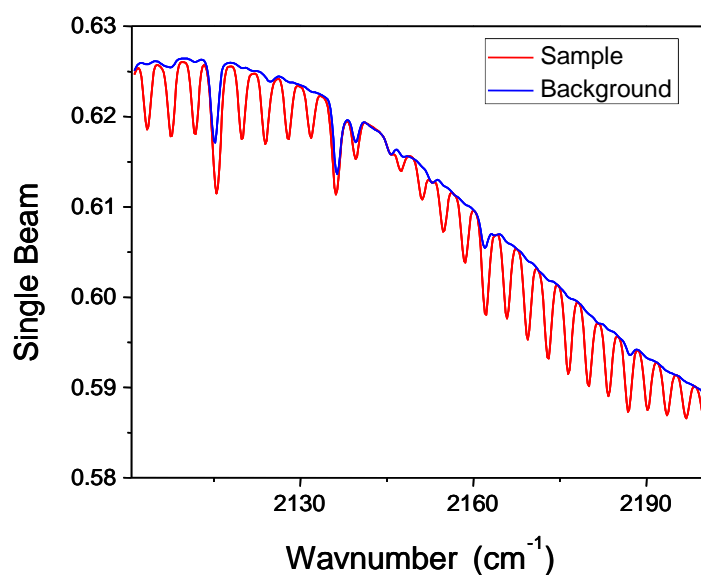

**Figure S1:** FT-IR analysis of the resulting gas during the reaction by a Bruker Tensor 27 FT-IR instrument (CO:  $1845.71 \pm 5.55$  ppm)

### 3. $^1\text{H}$ and $^{13}\text{C}$ NMR spectra of the products

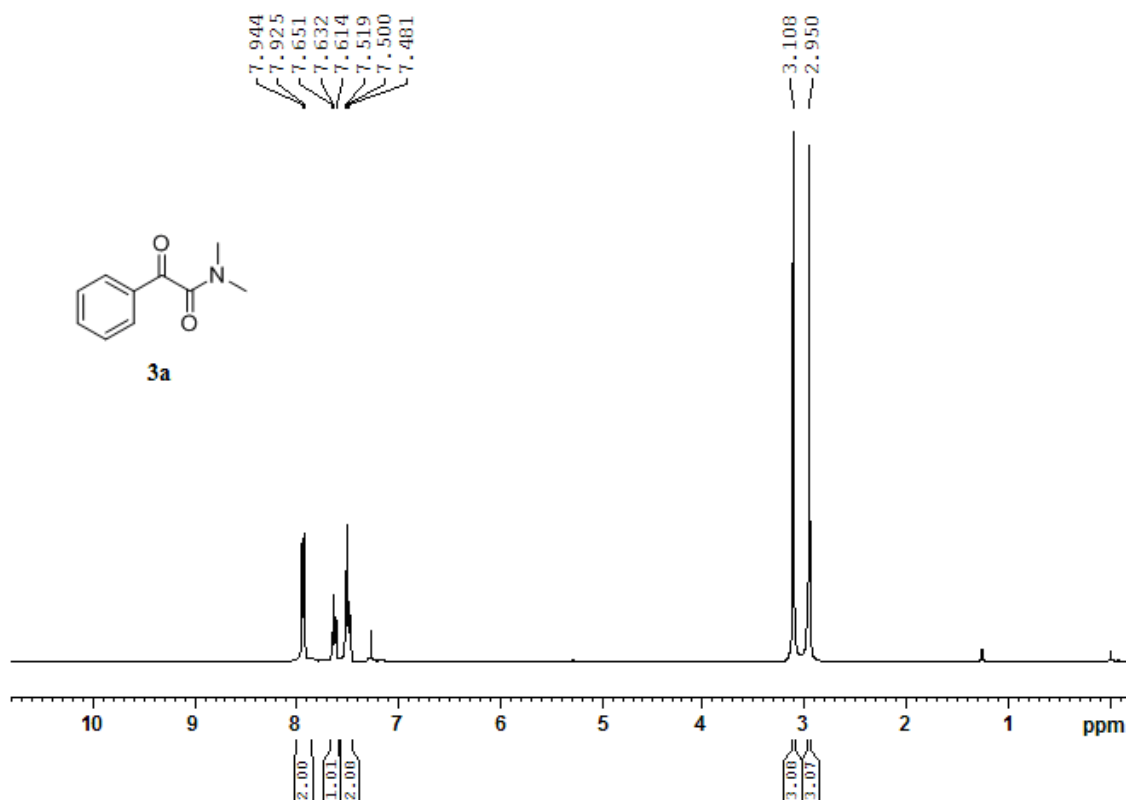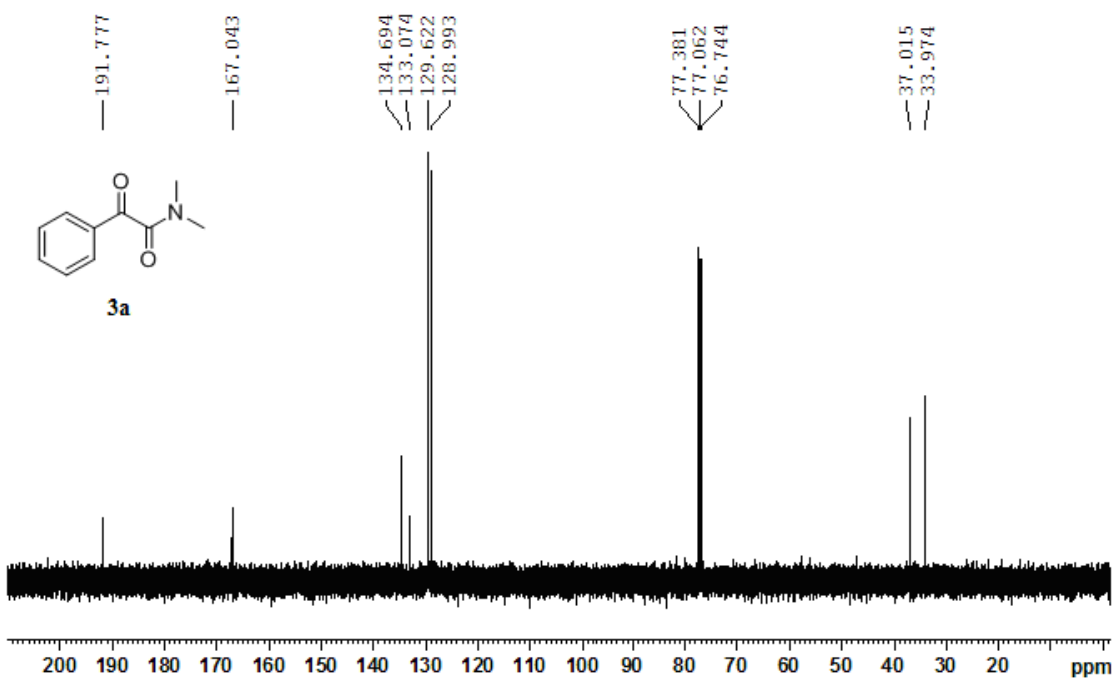

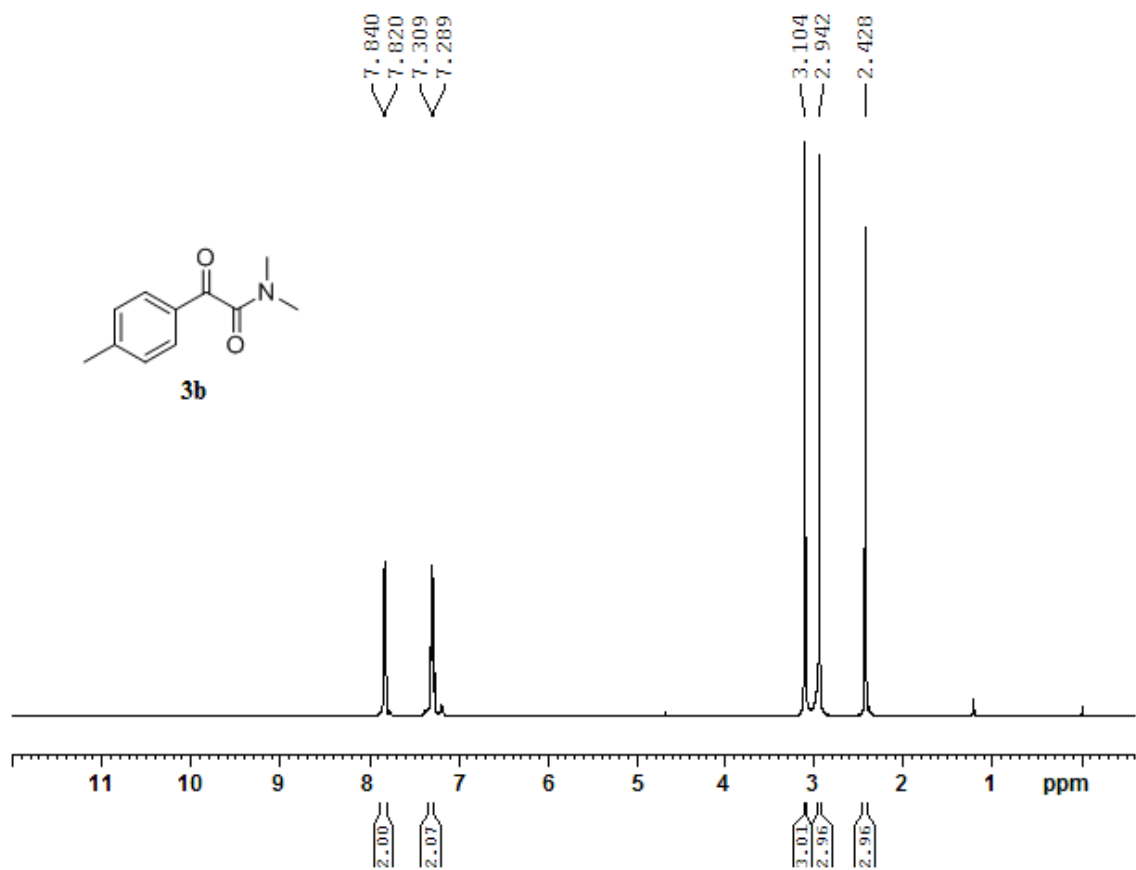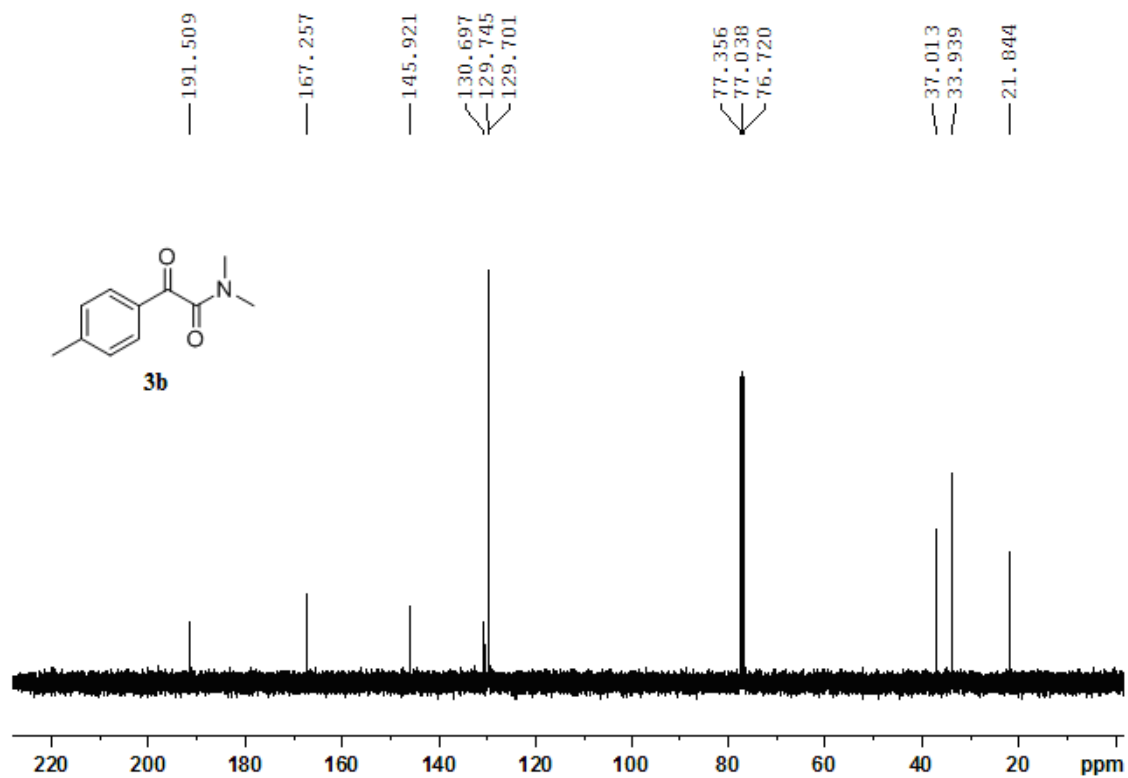

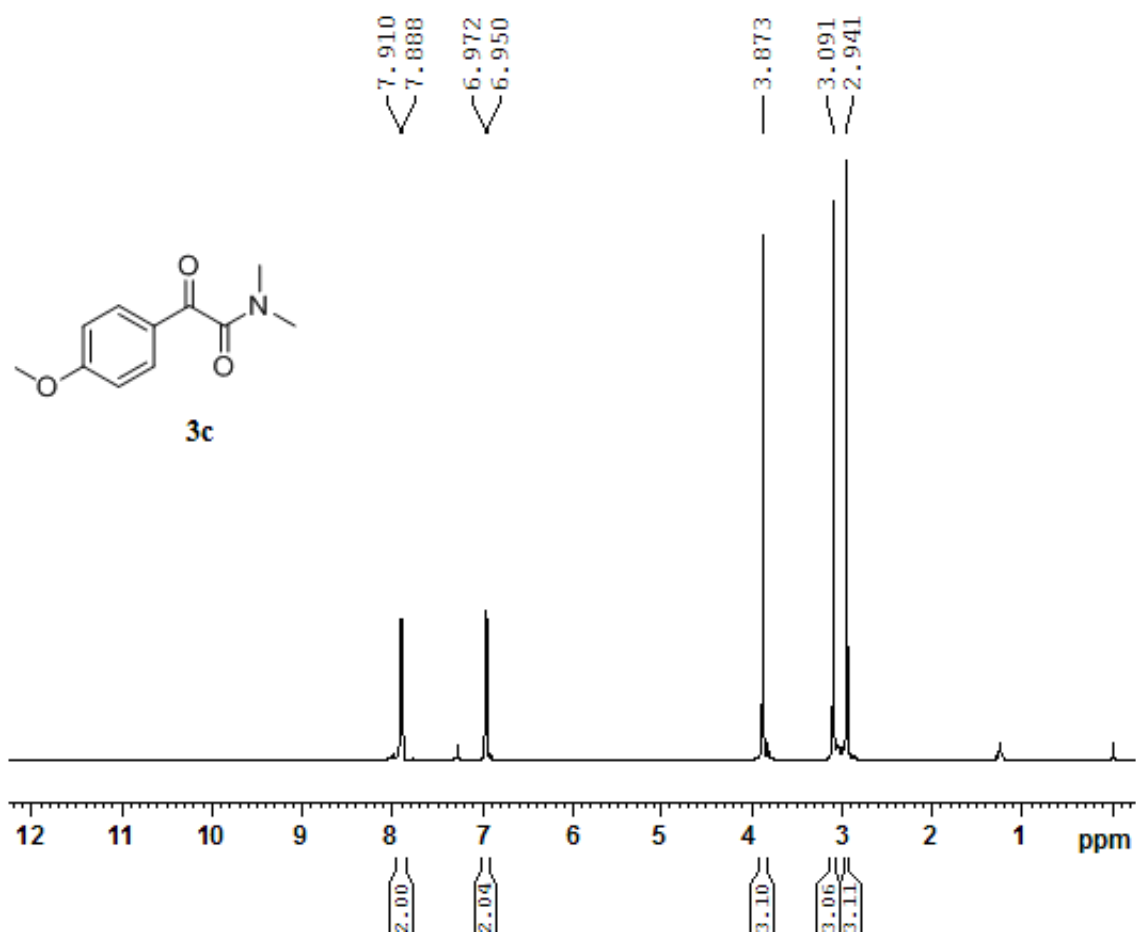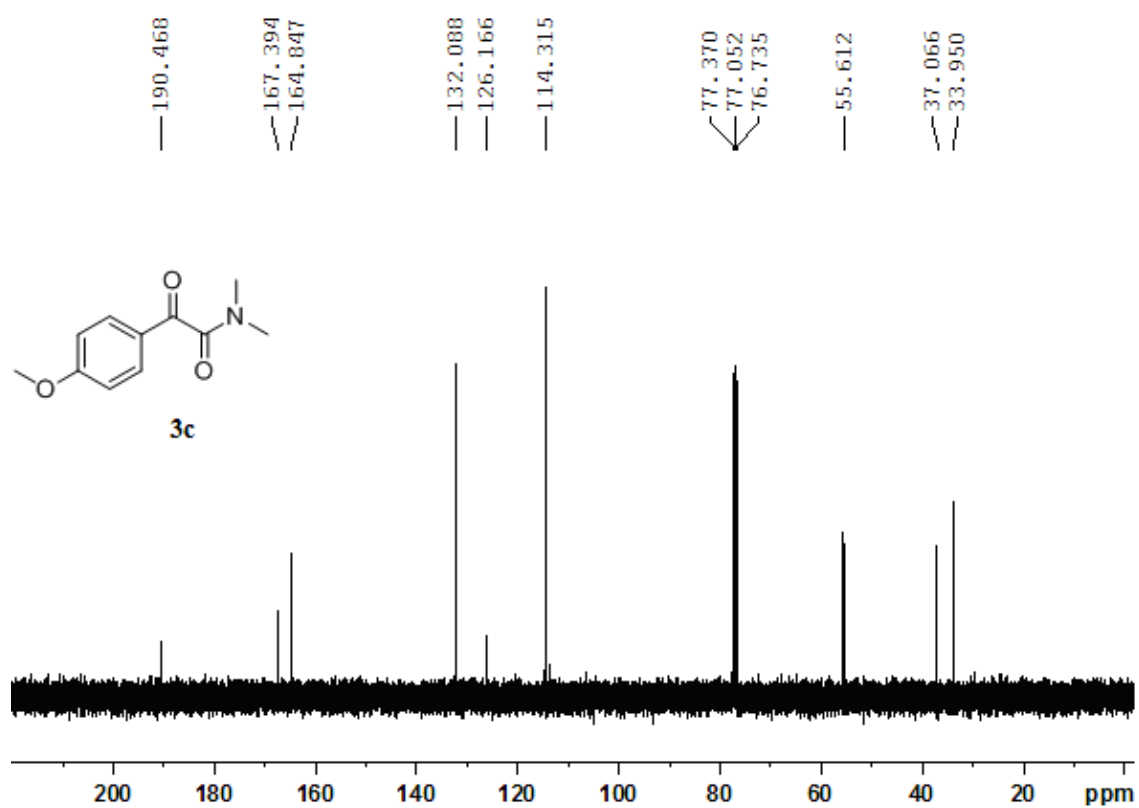

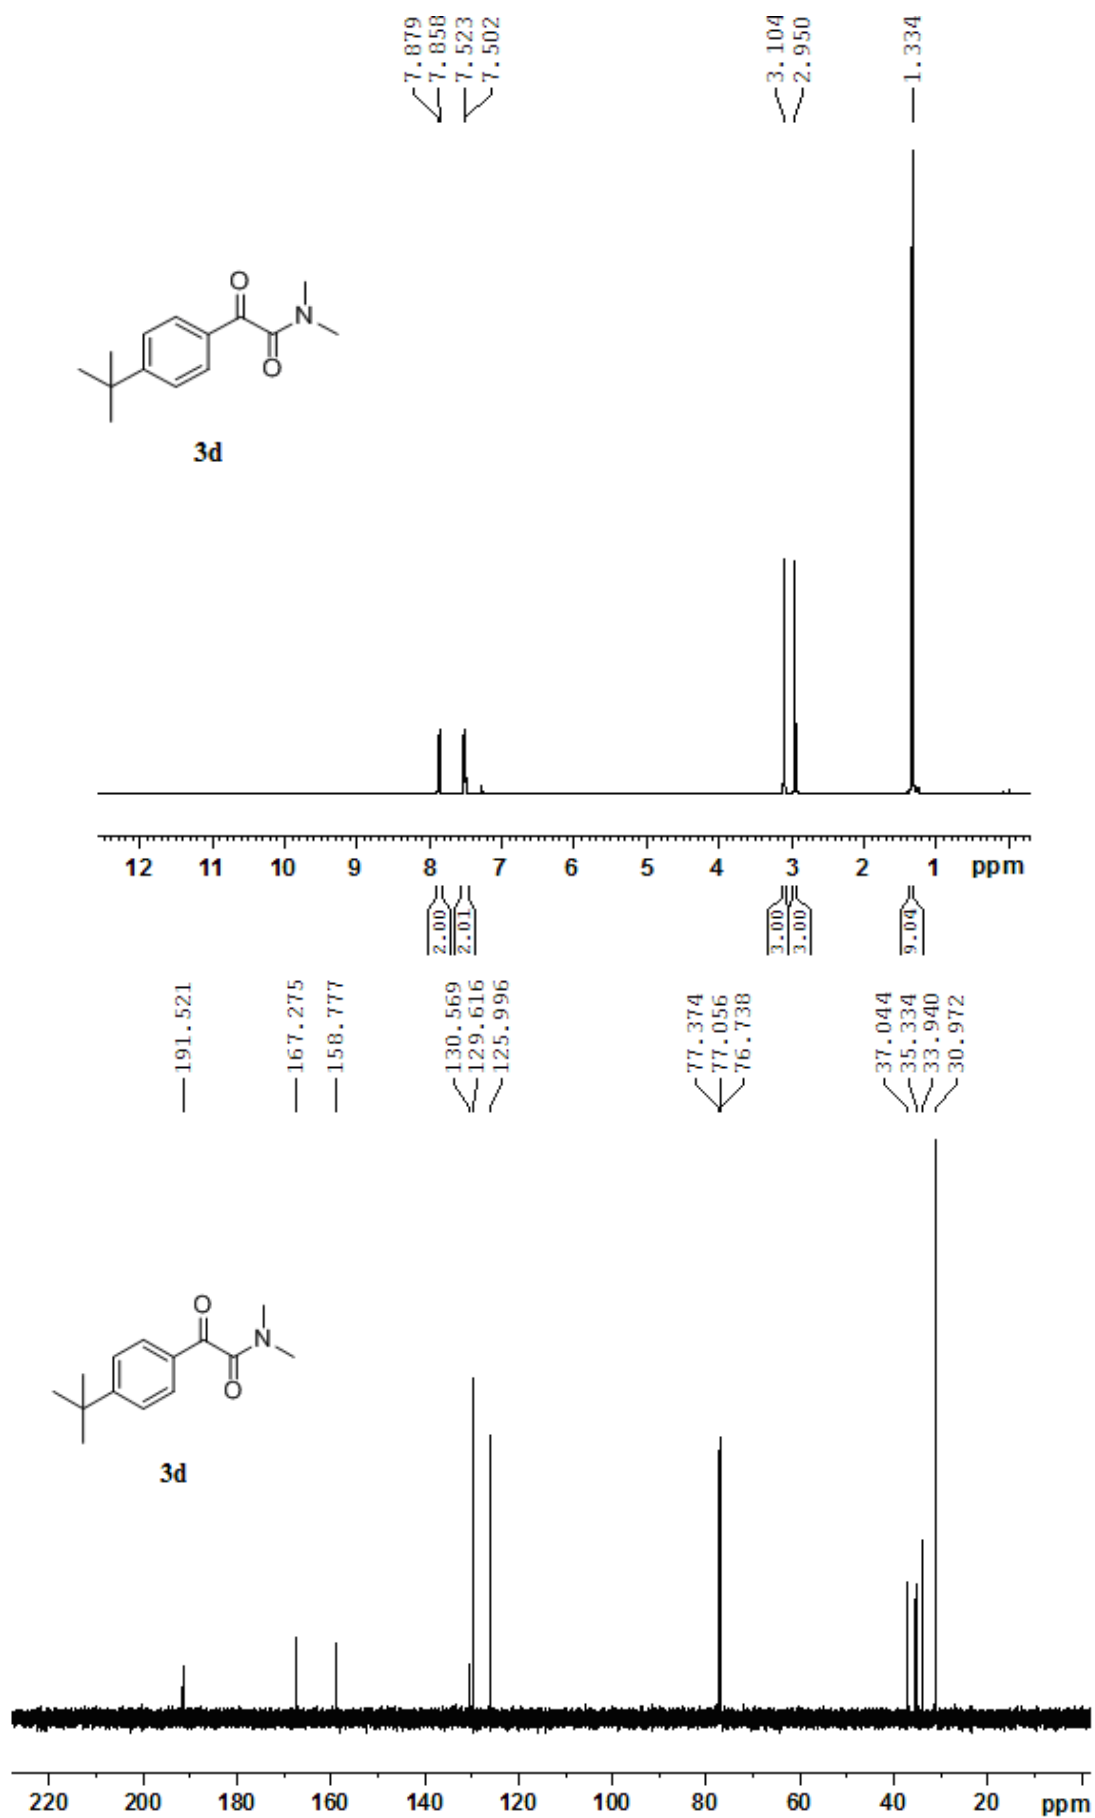

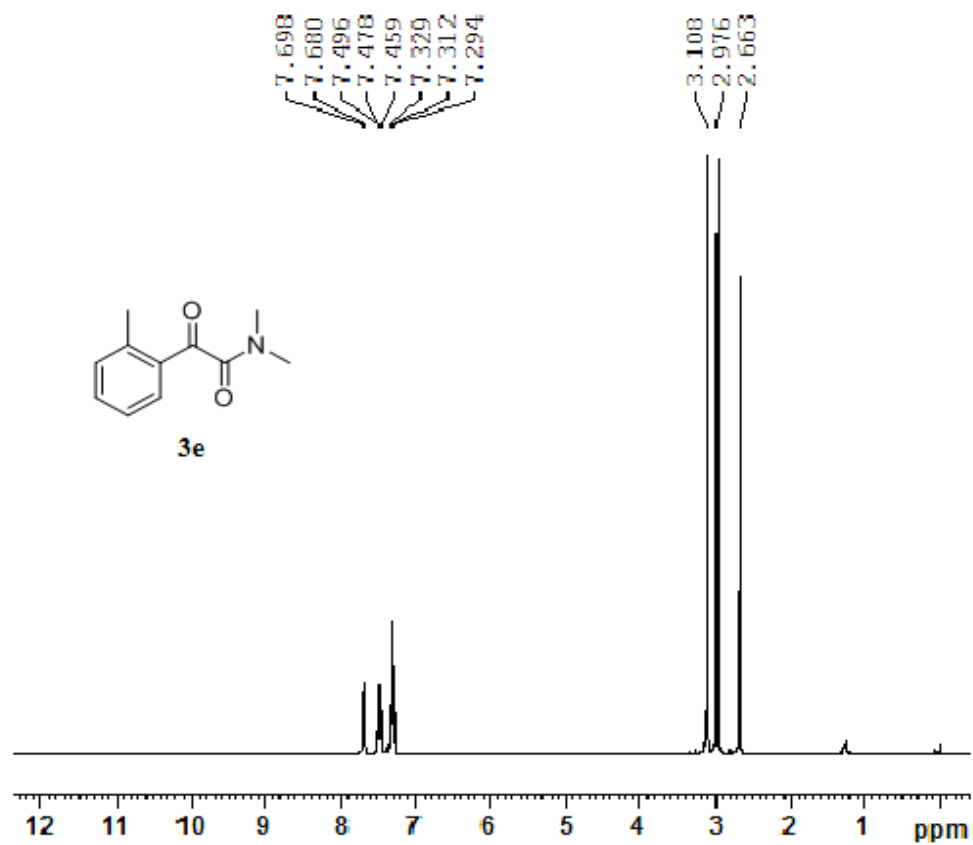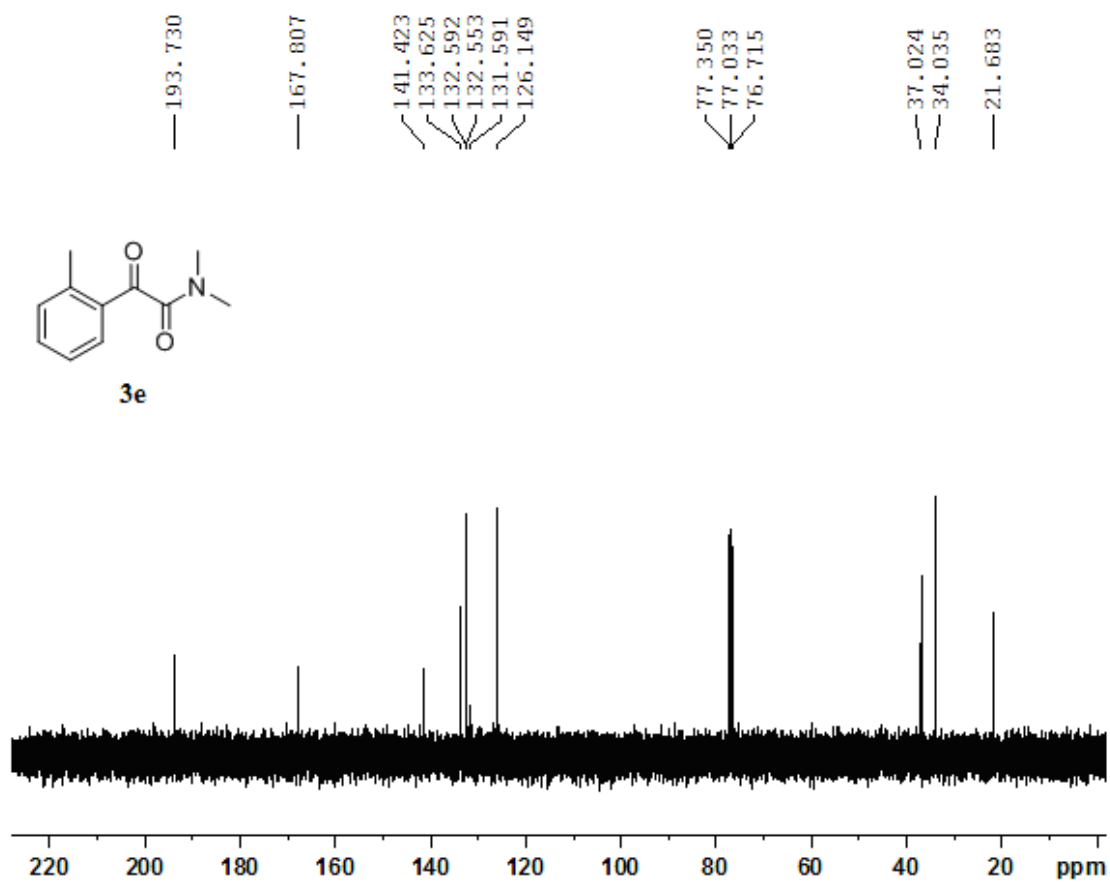

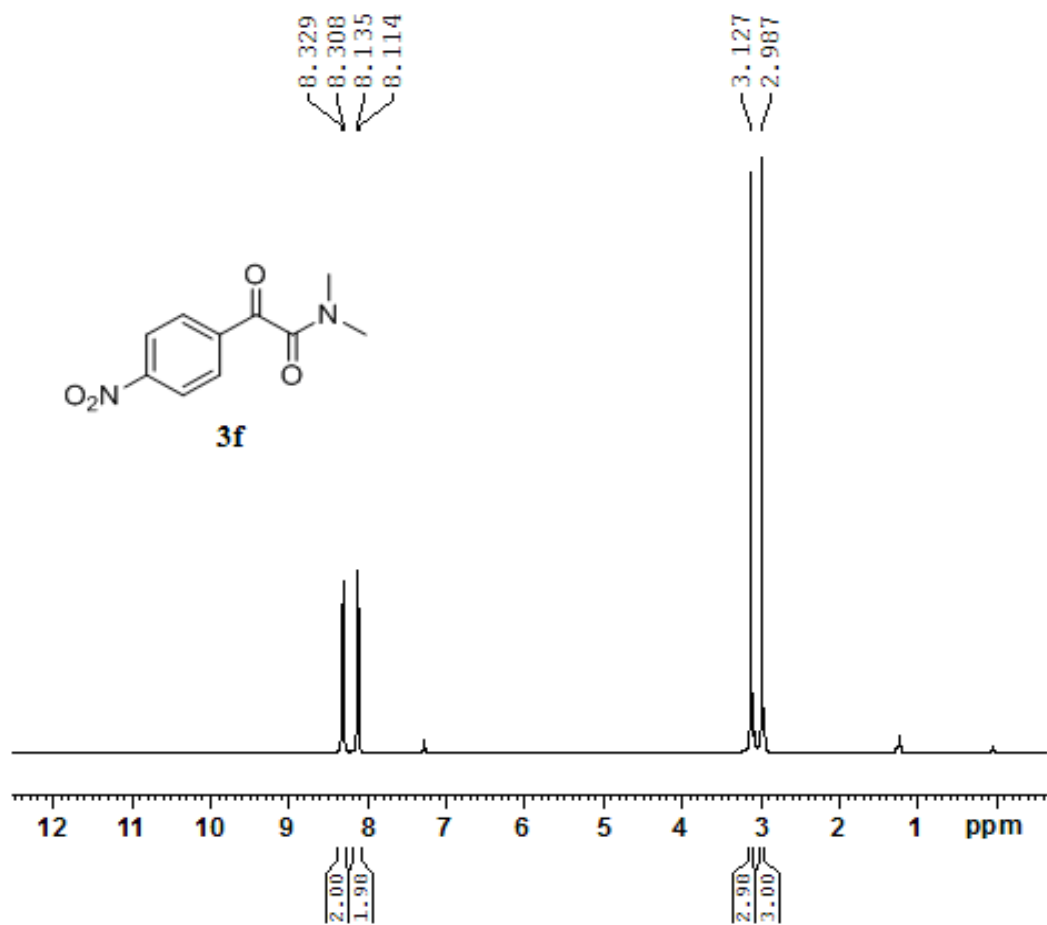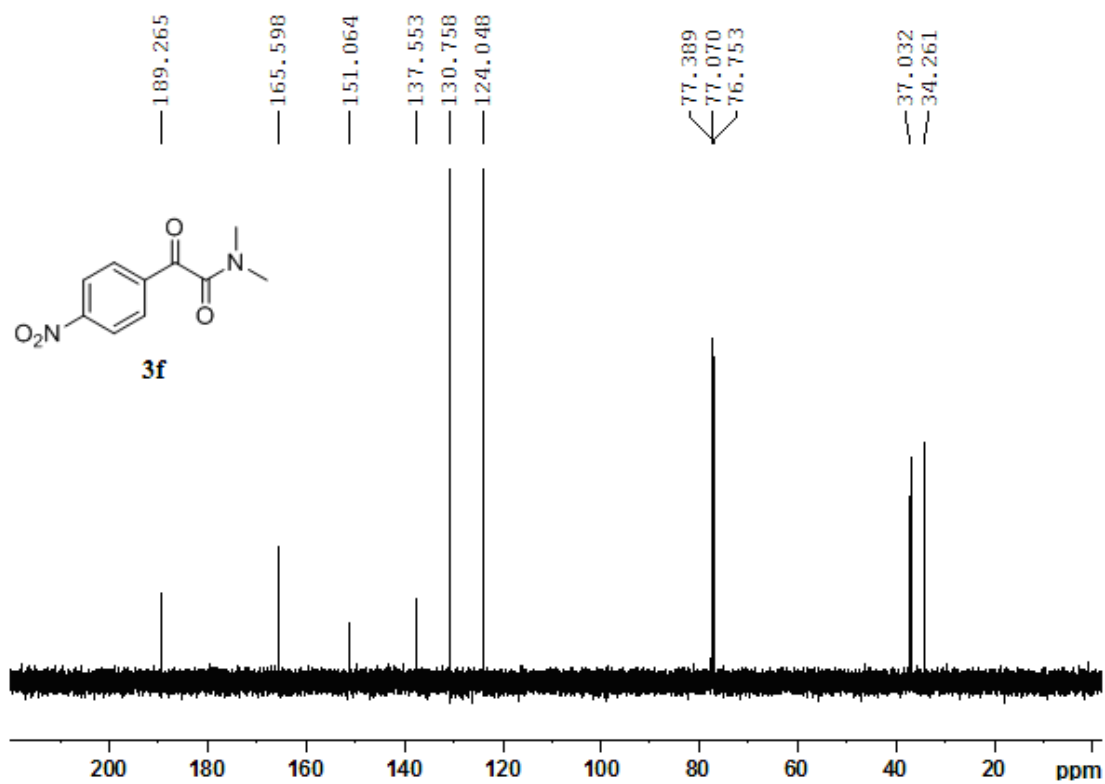



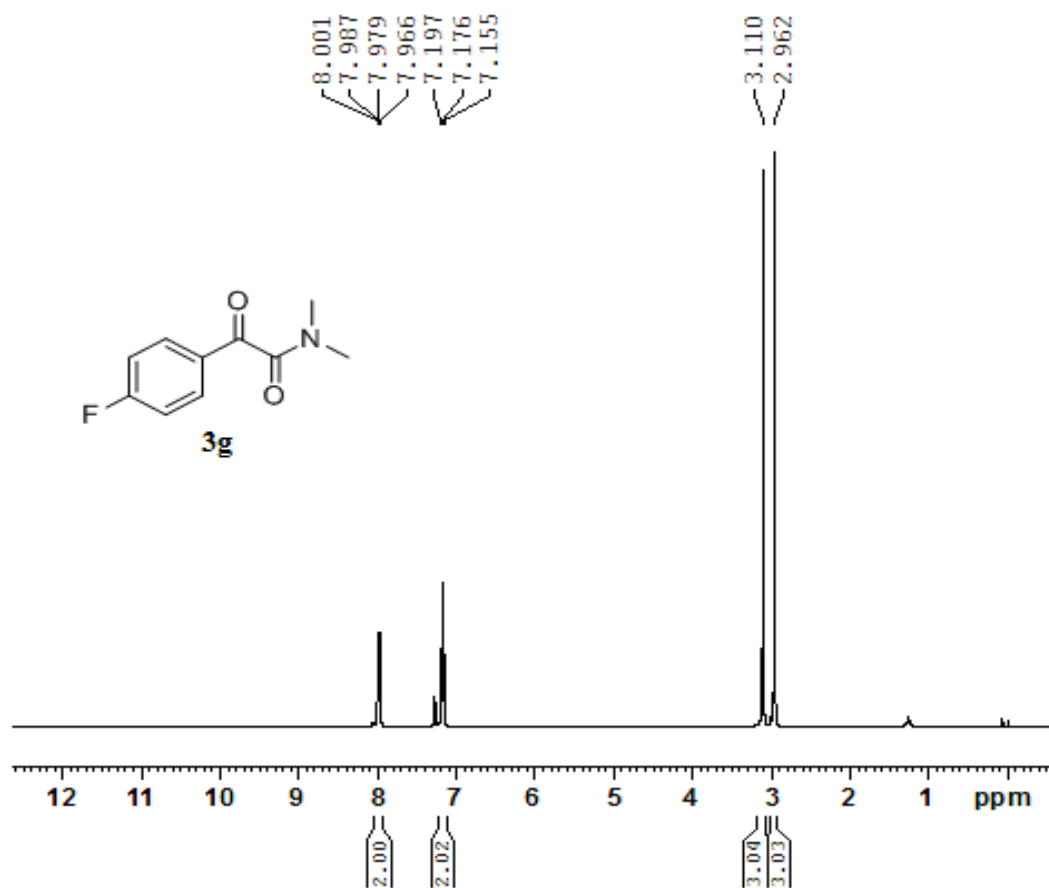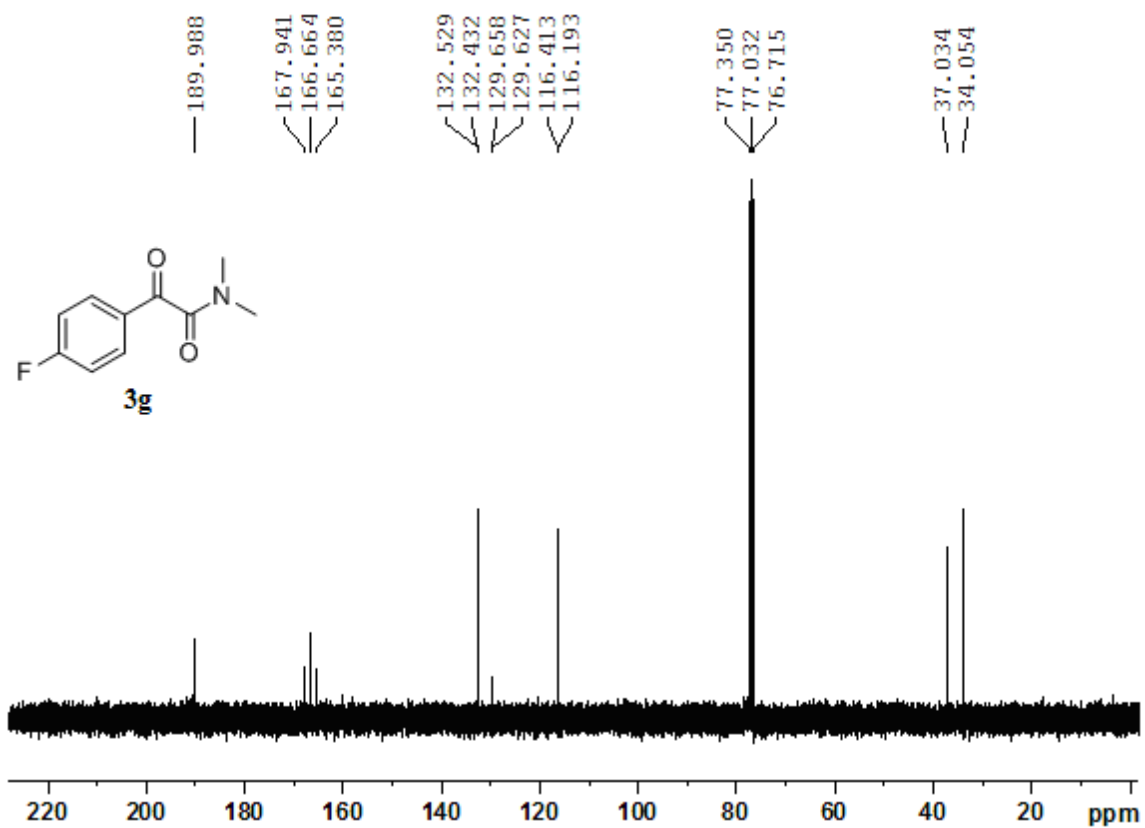

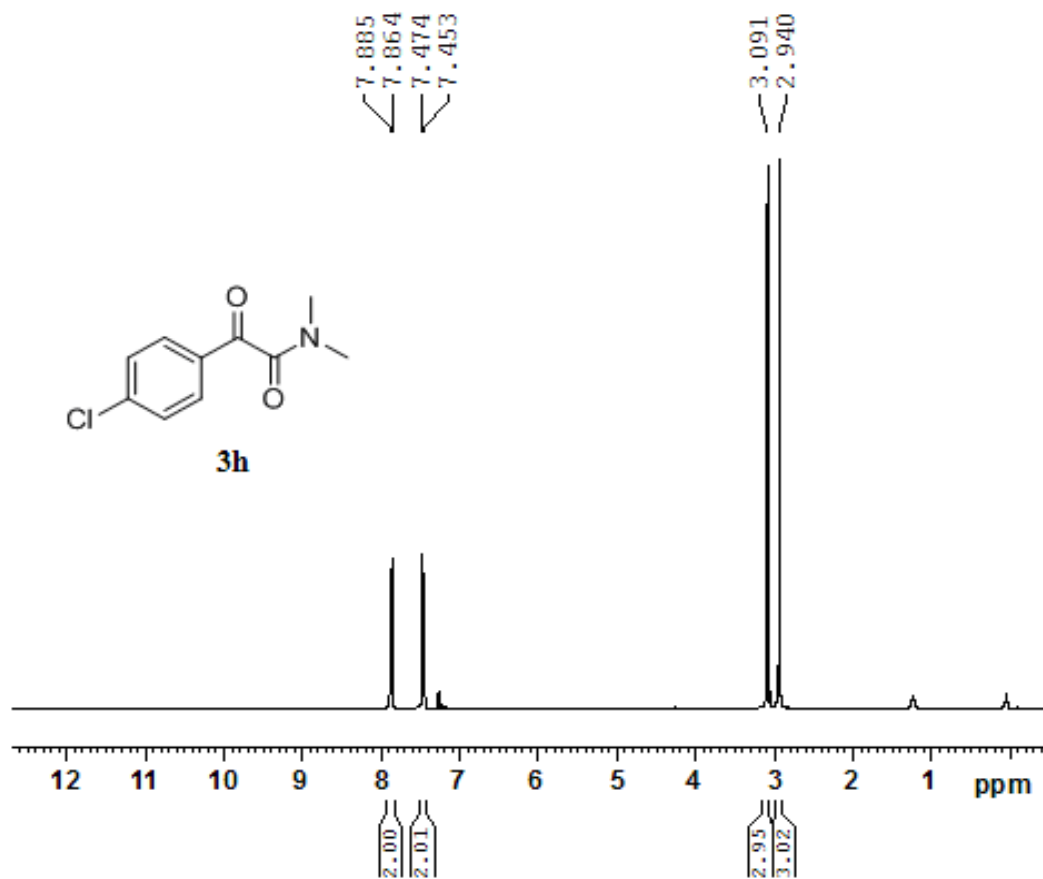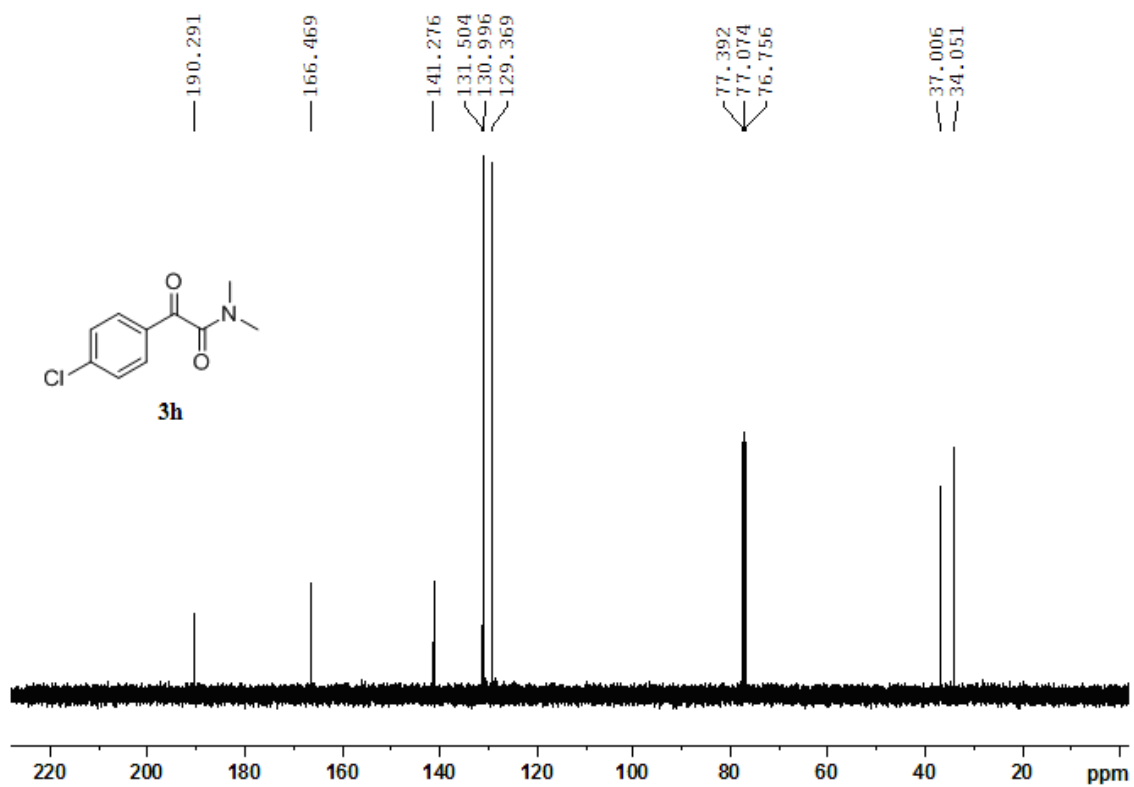

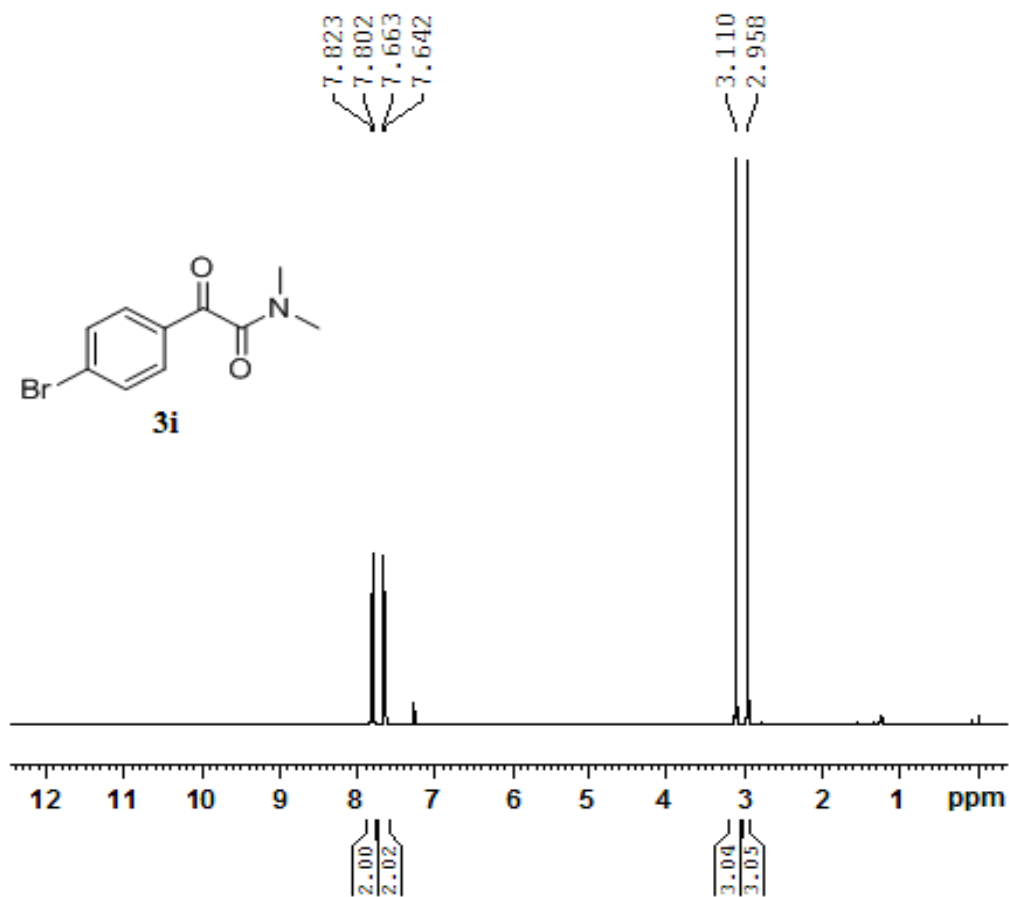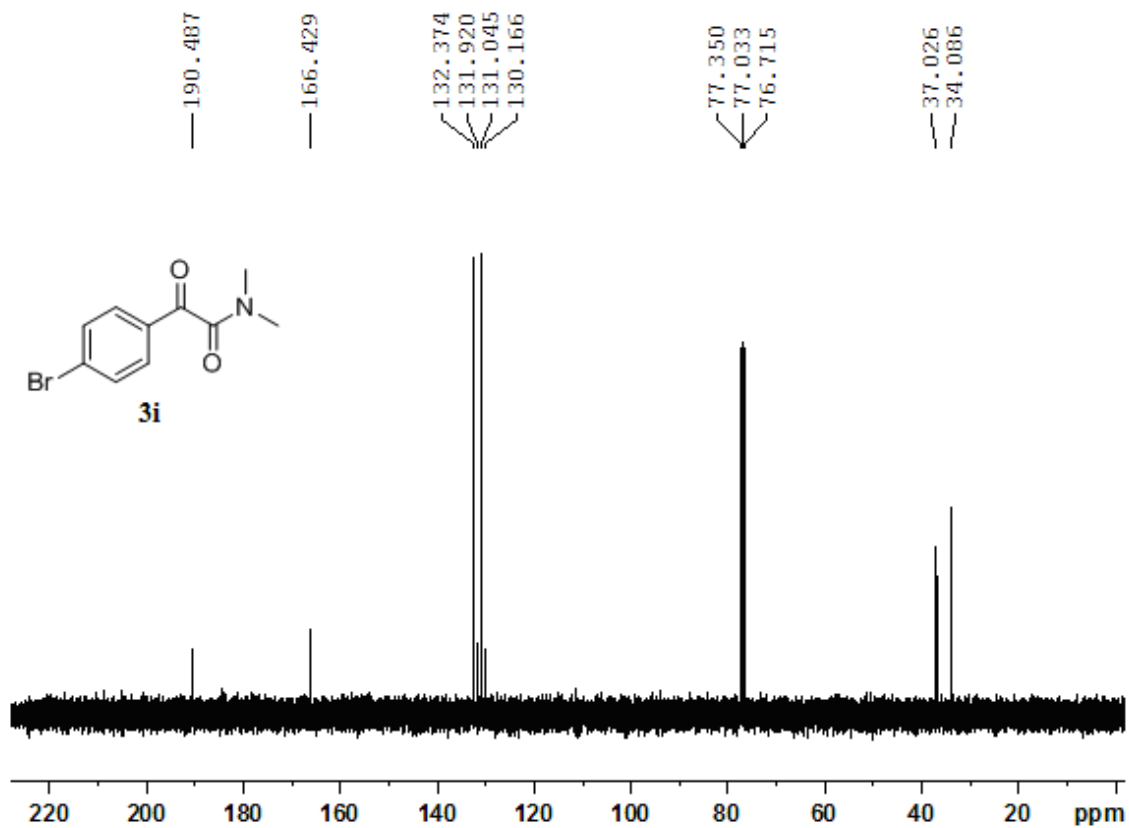

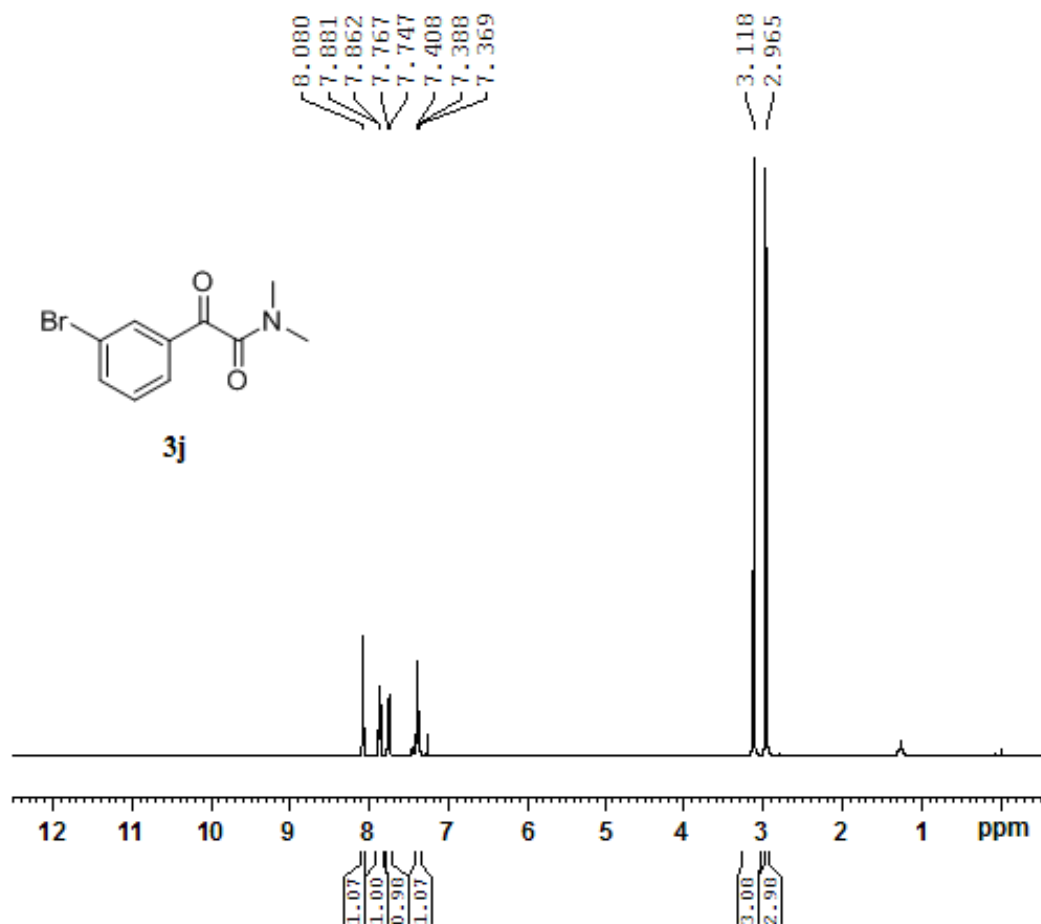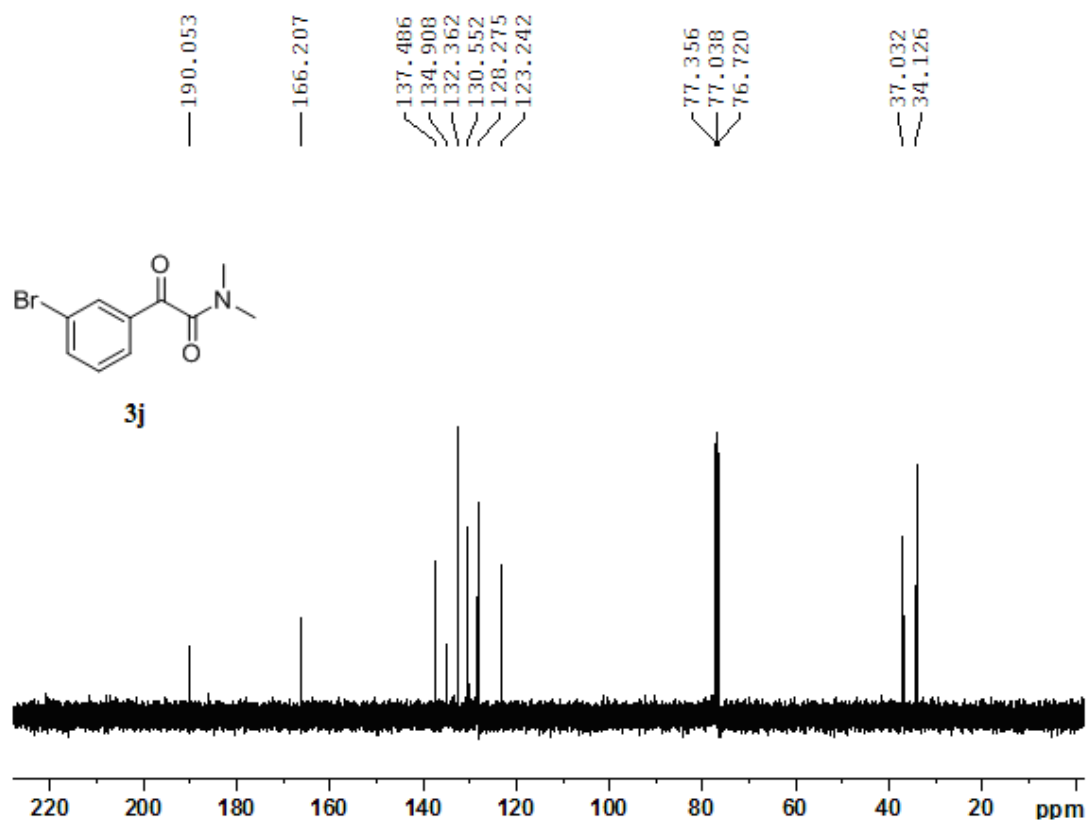

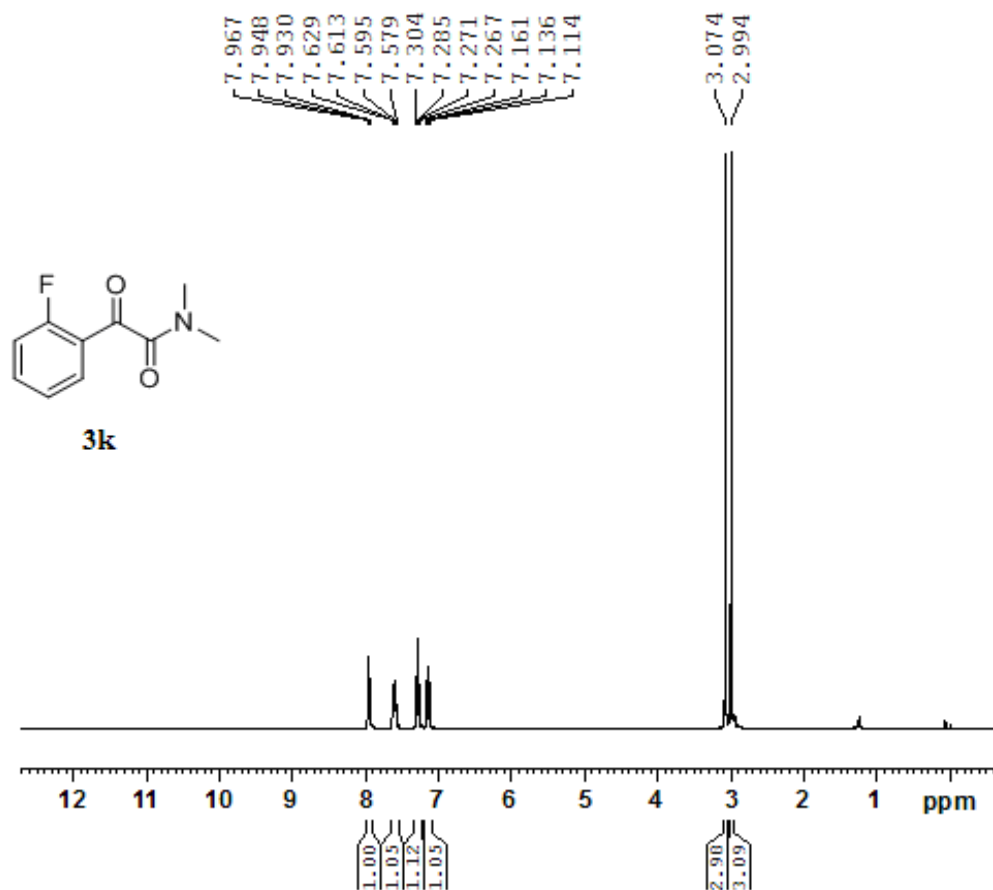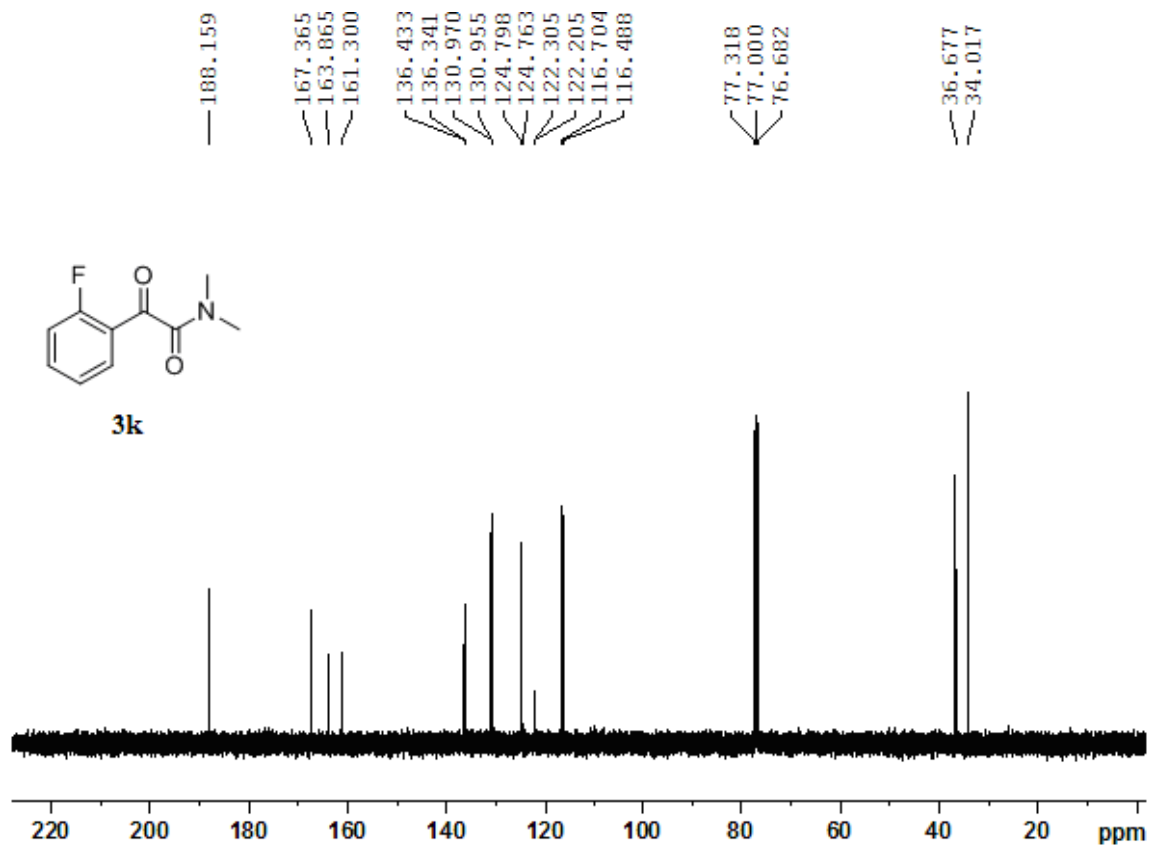

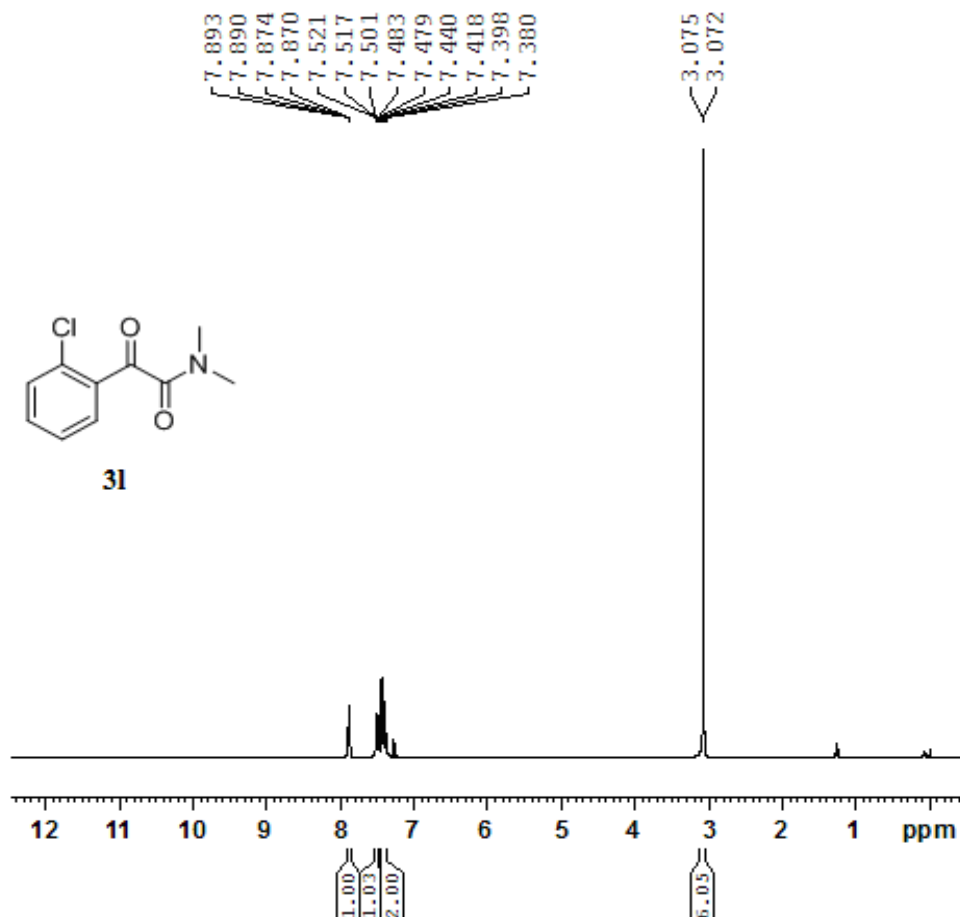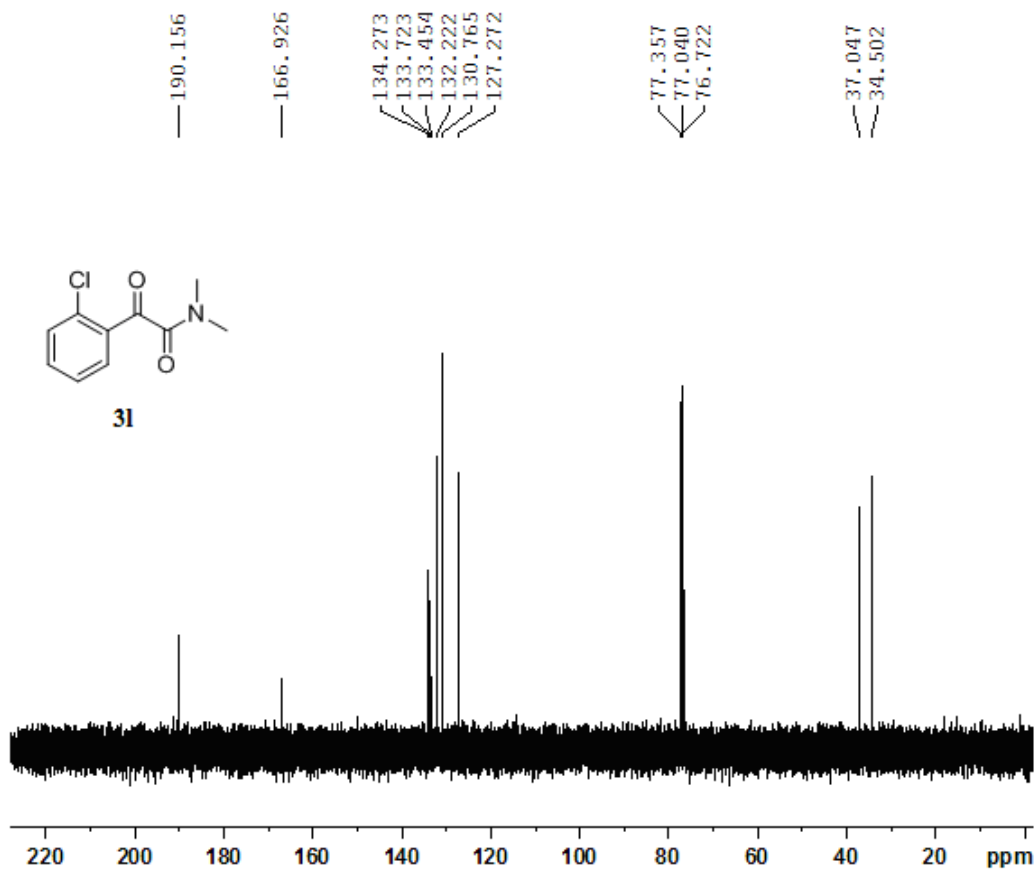

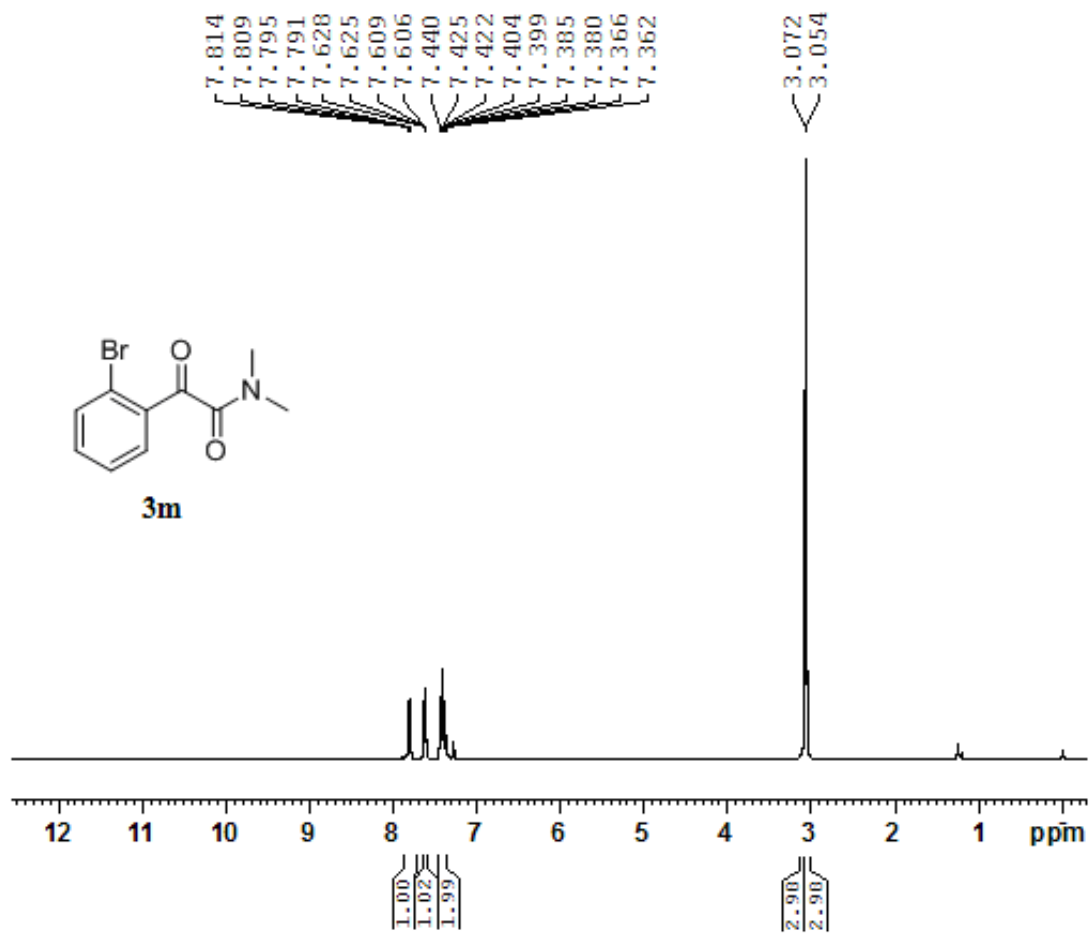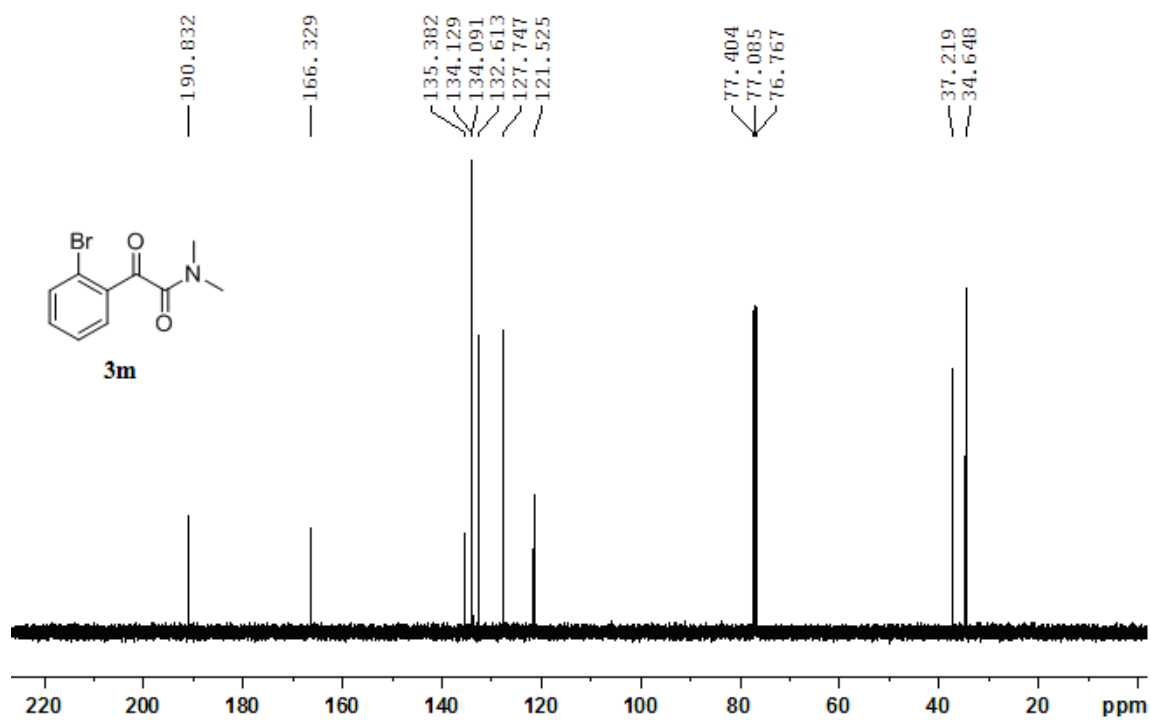

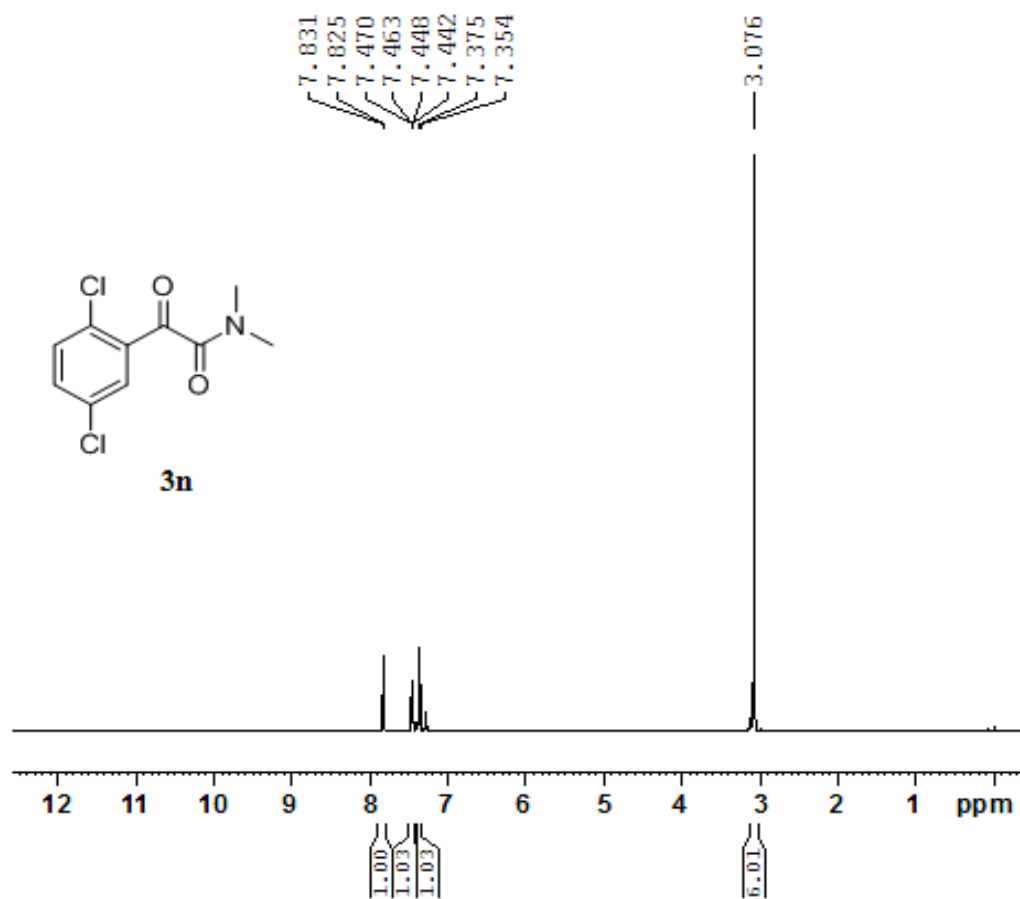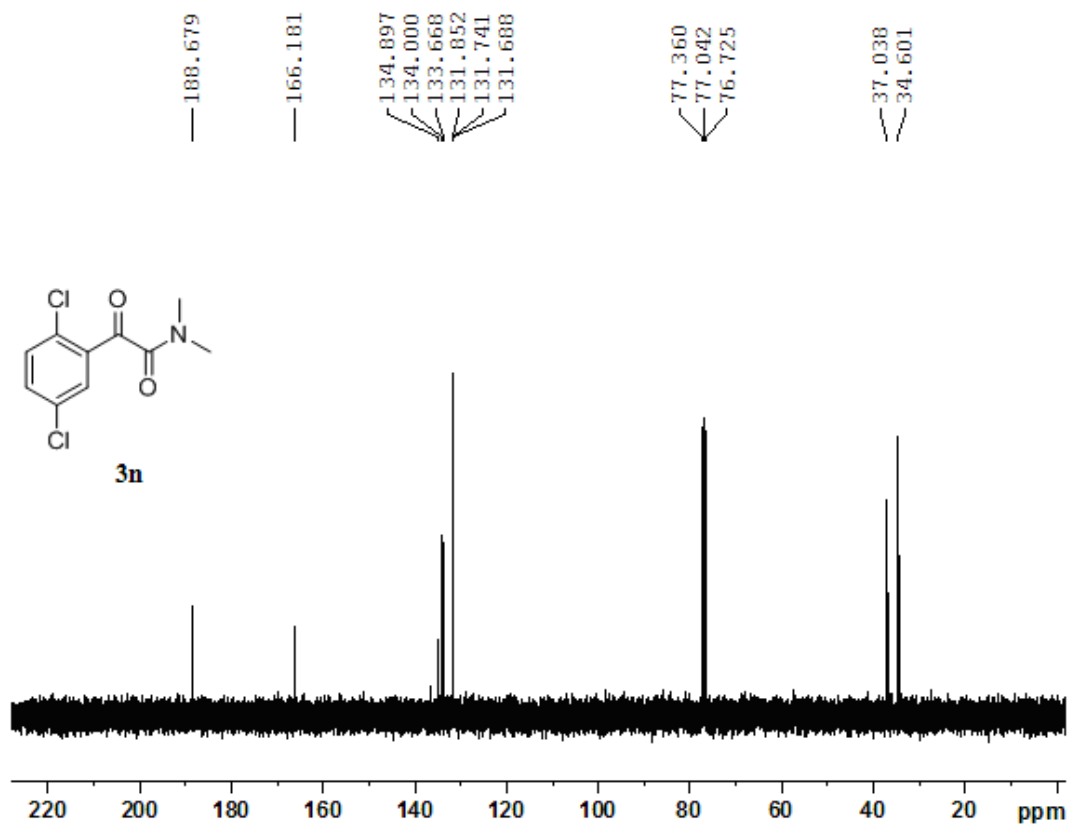



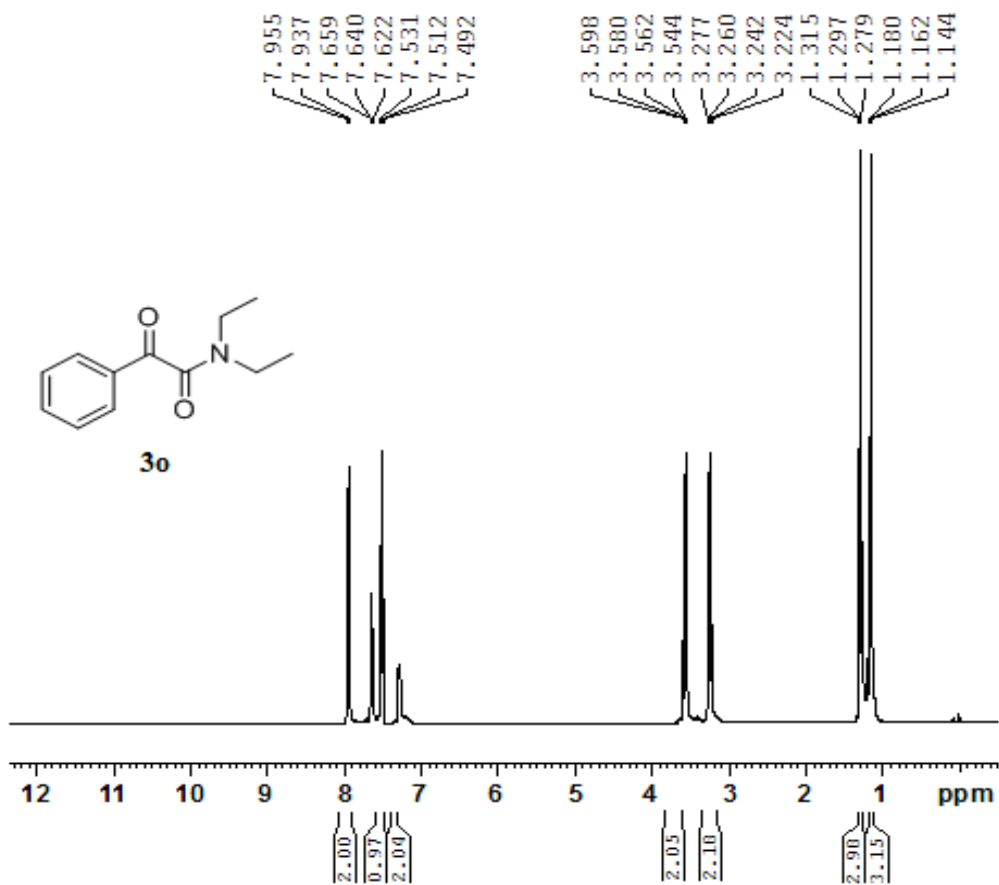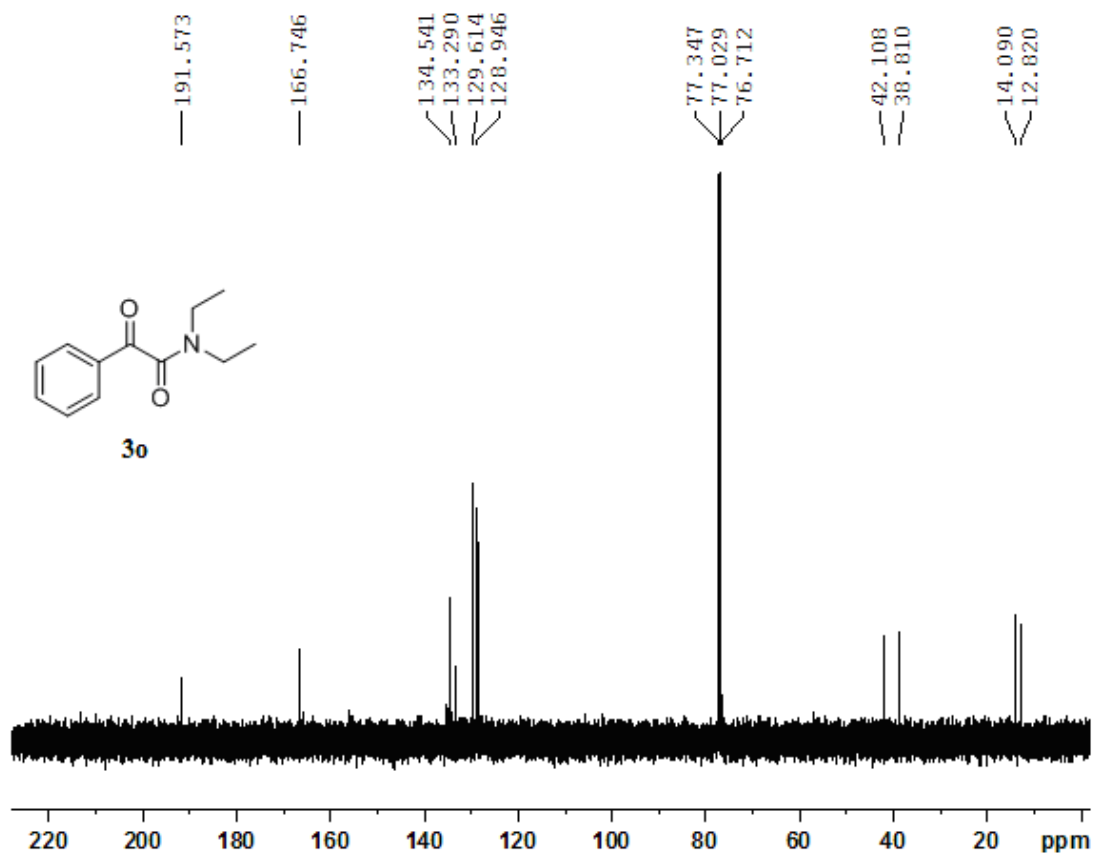

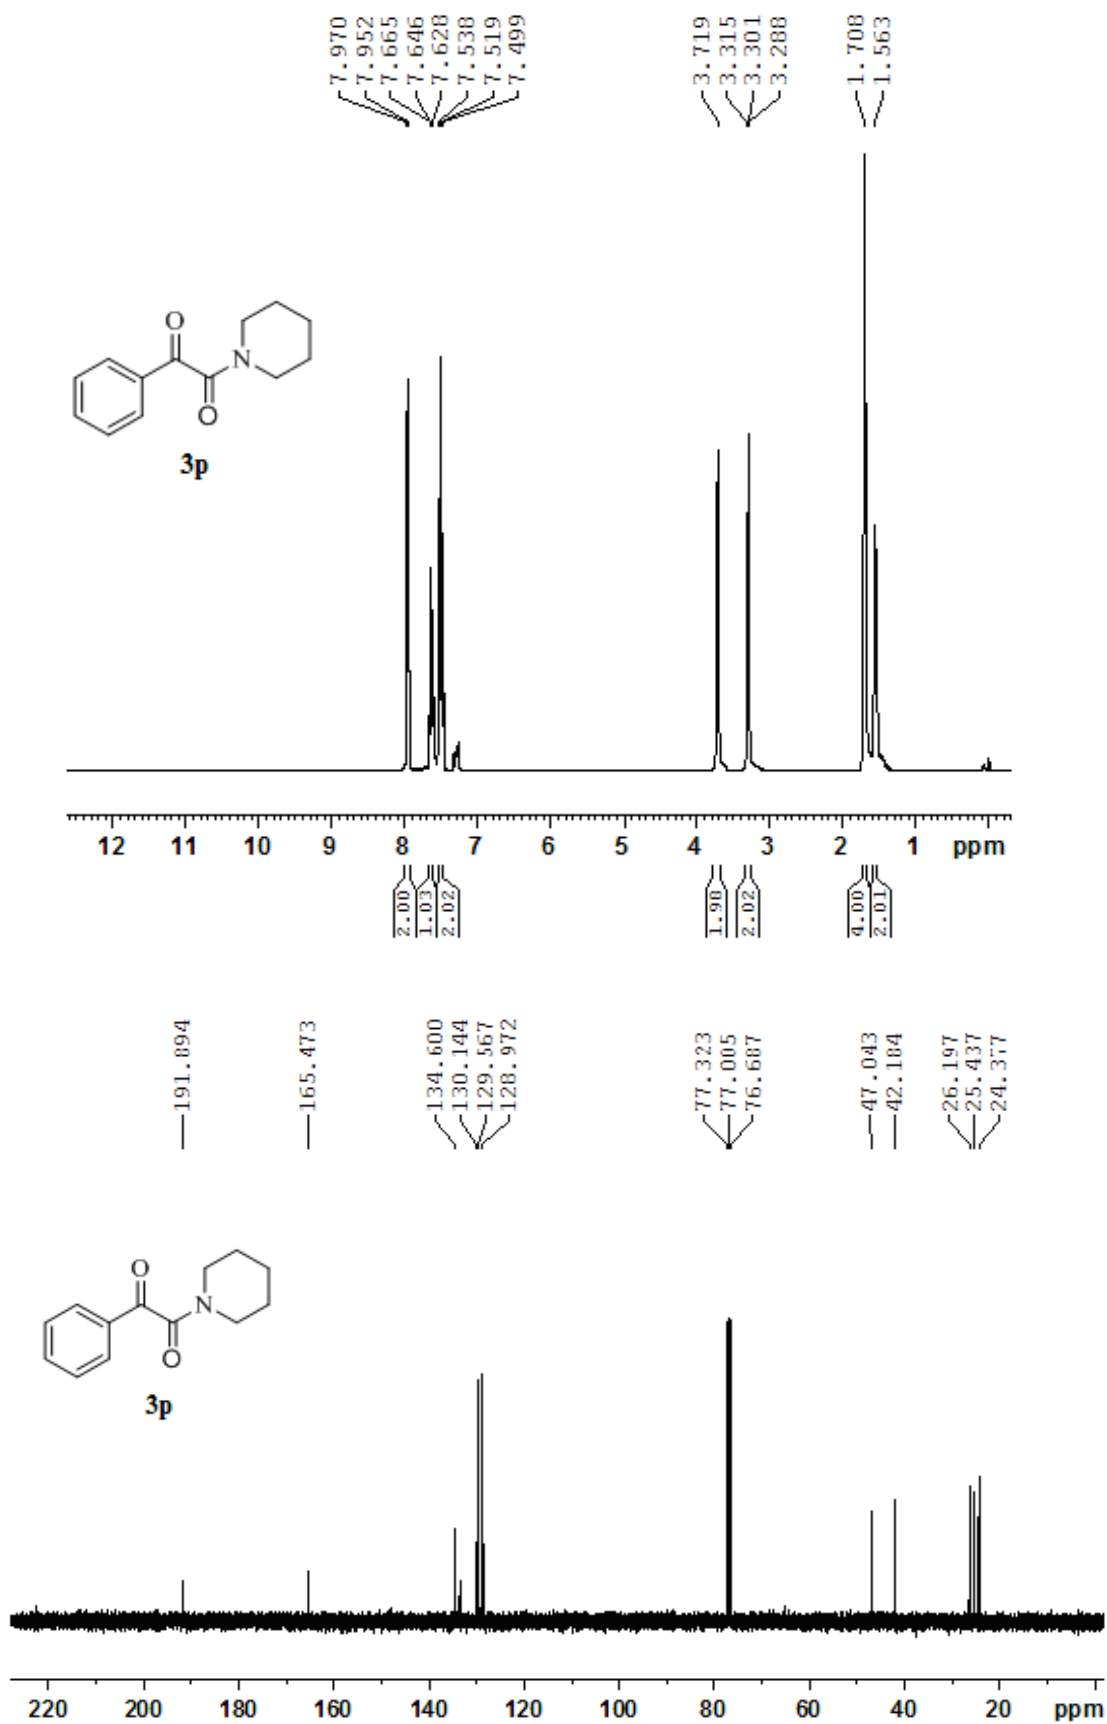

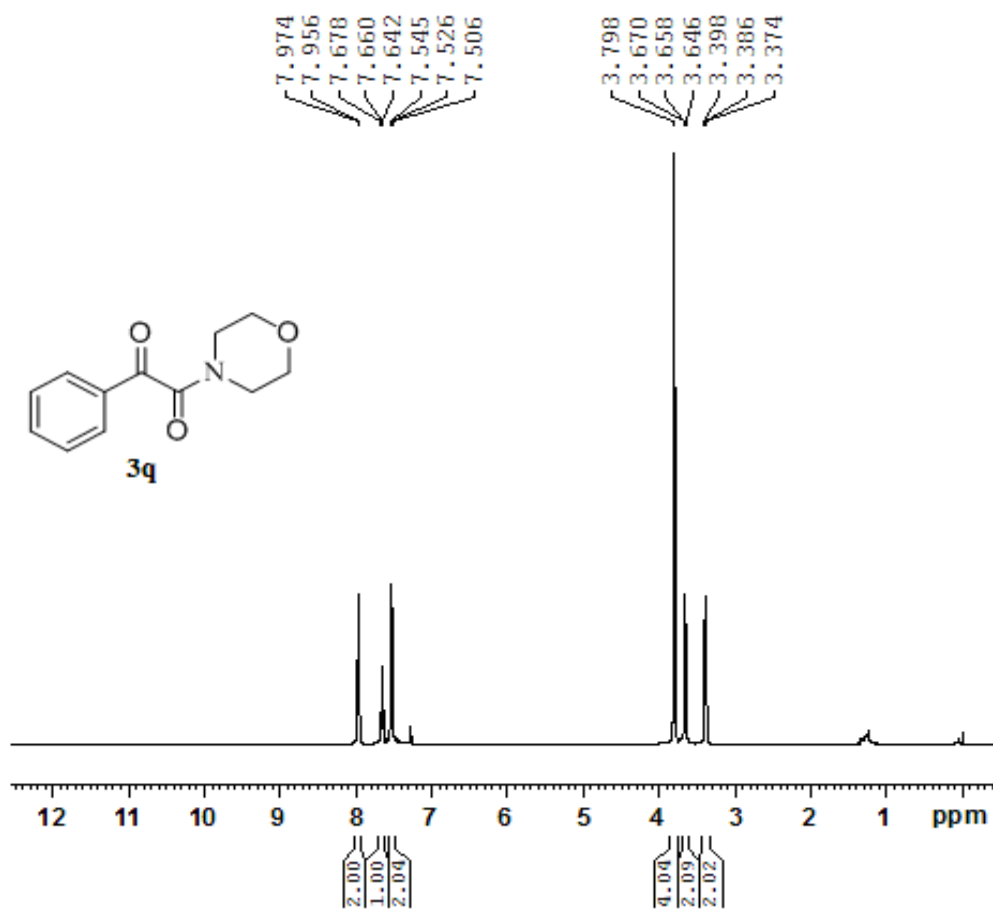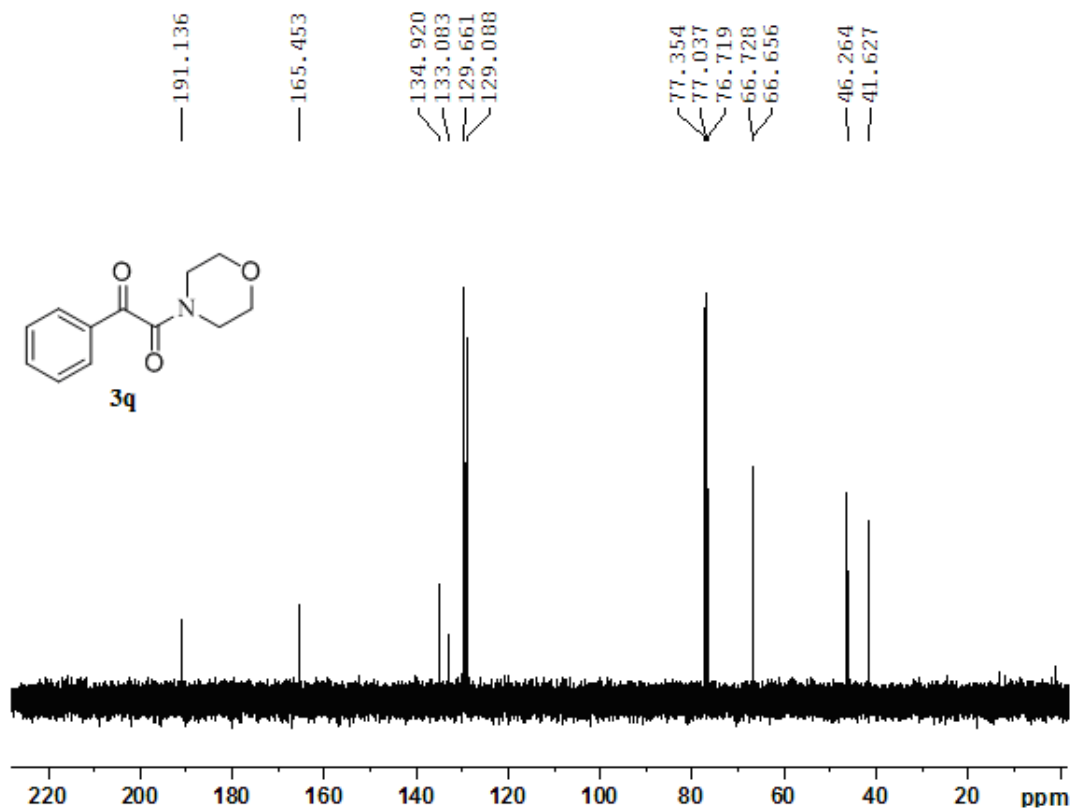

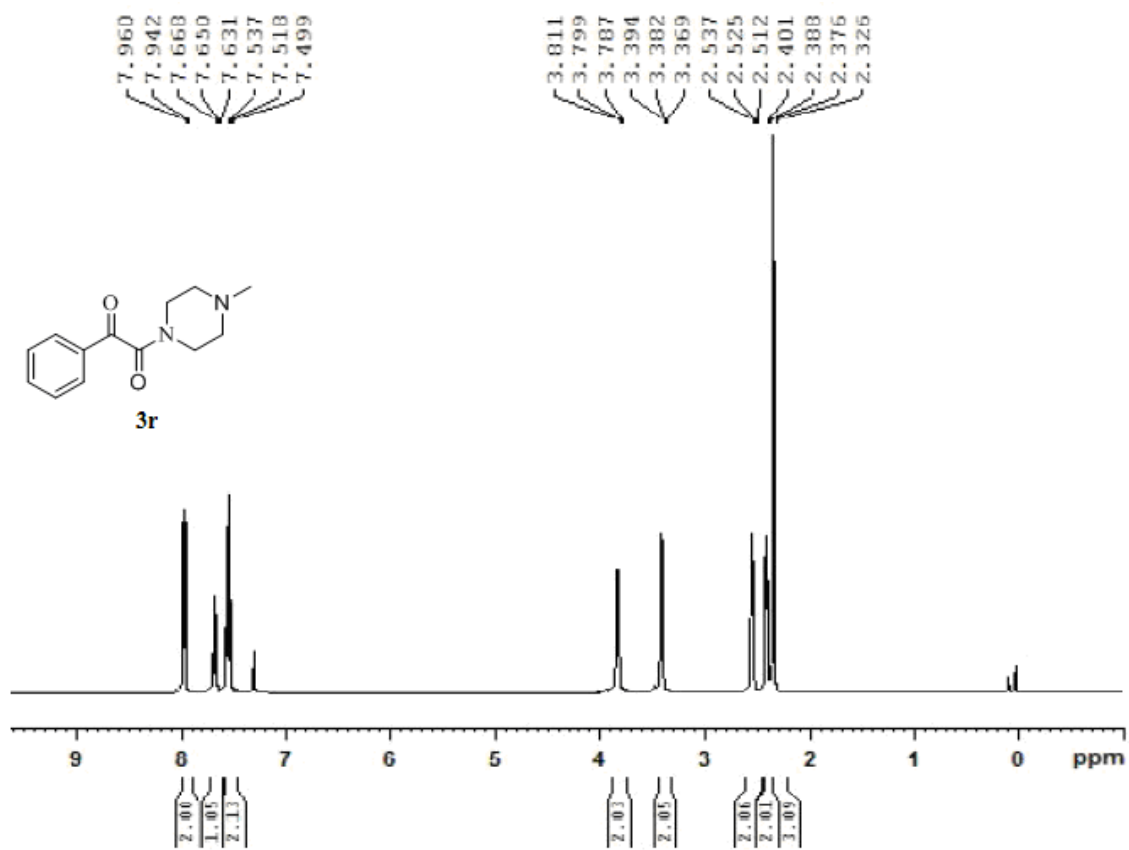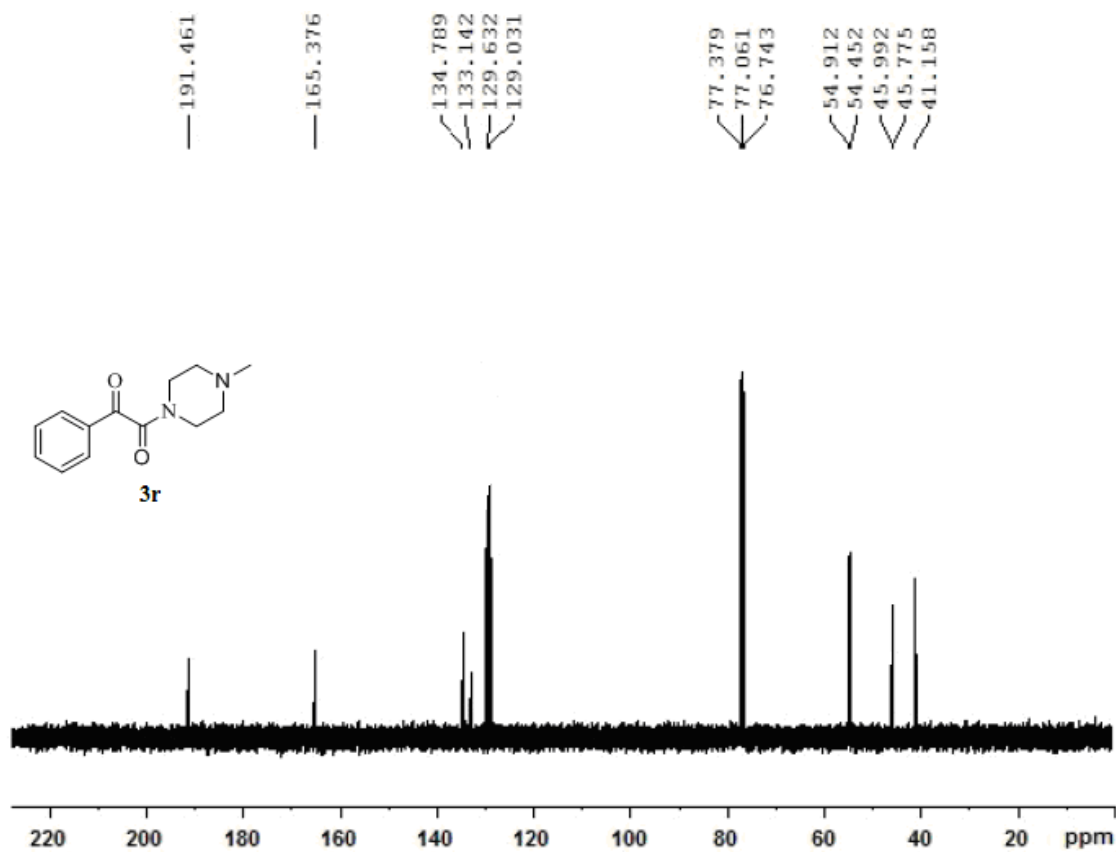

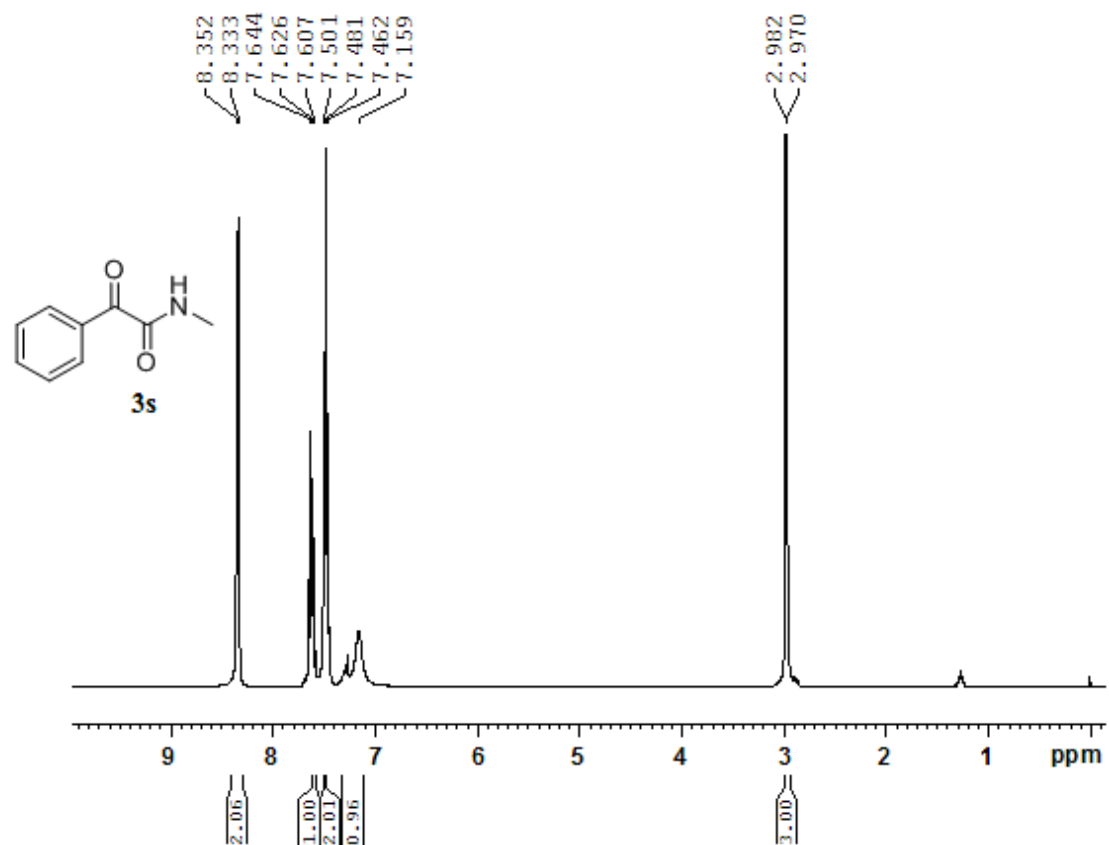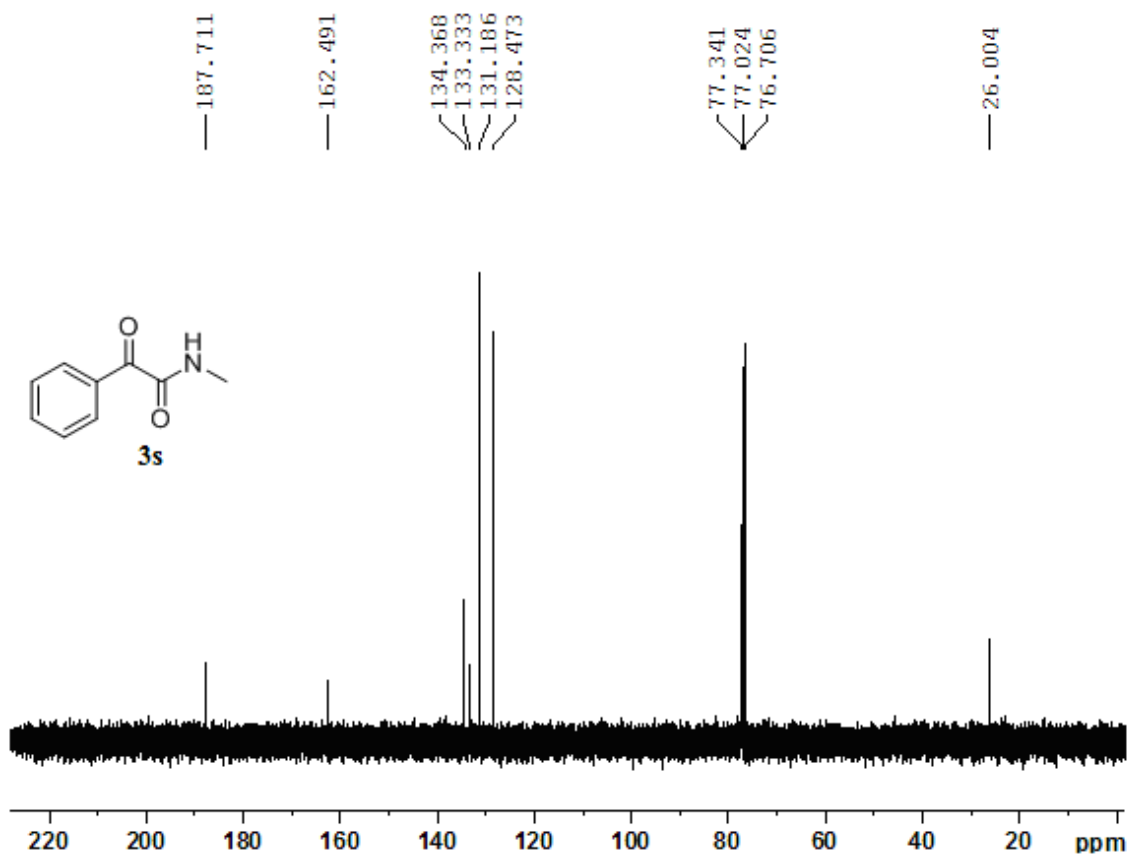

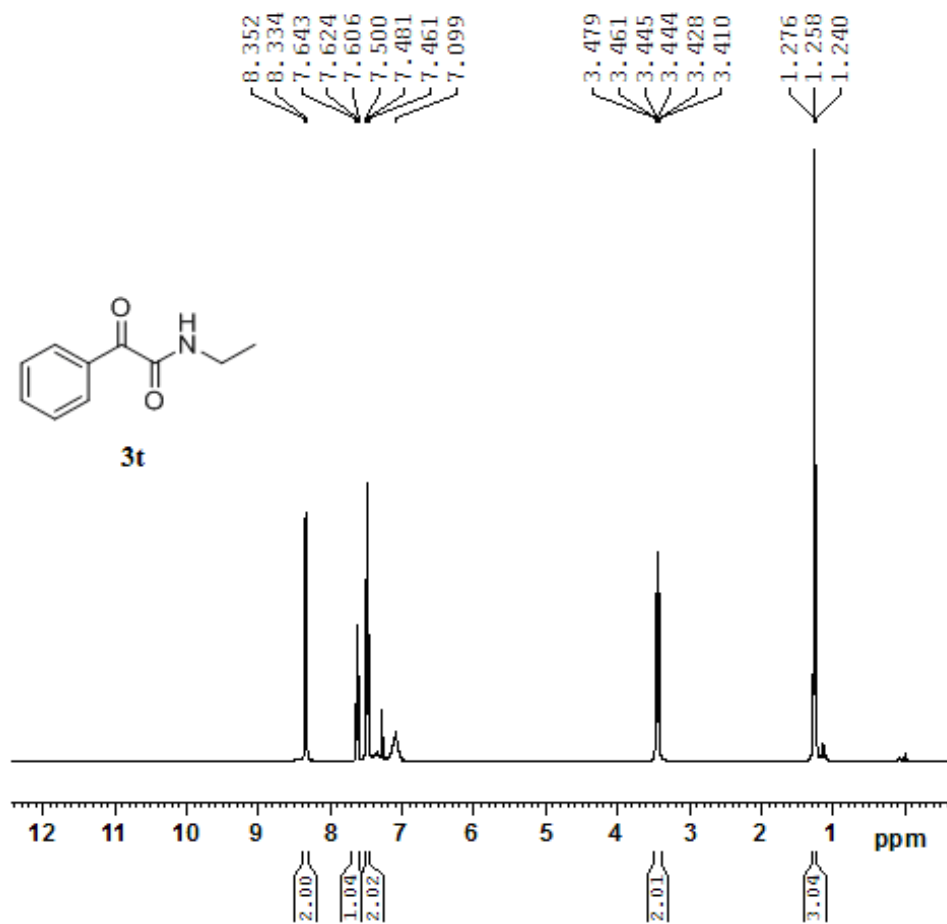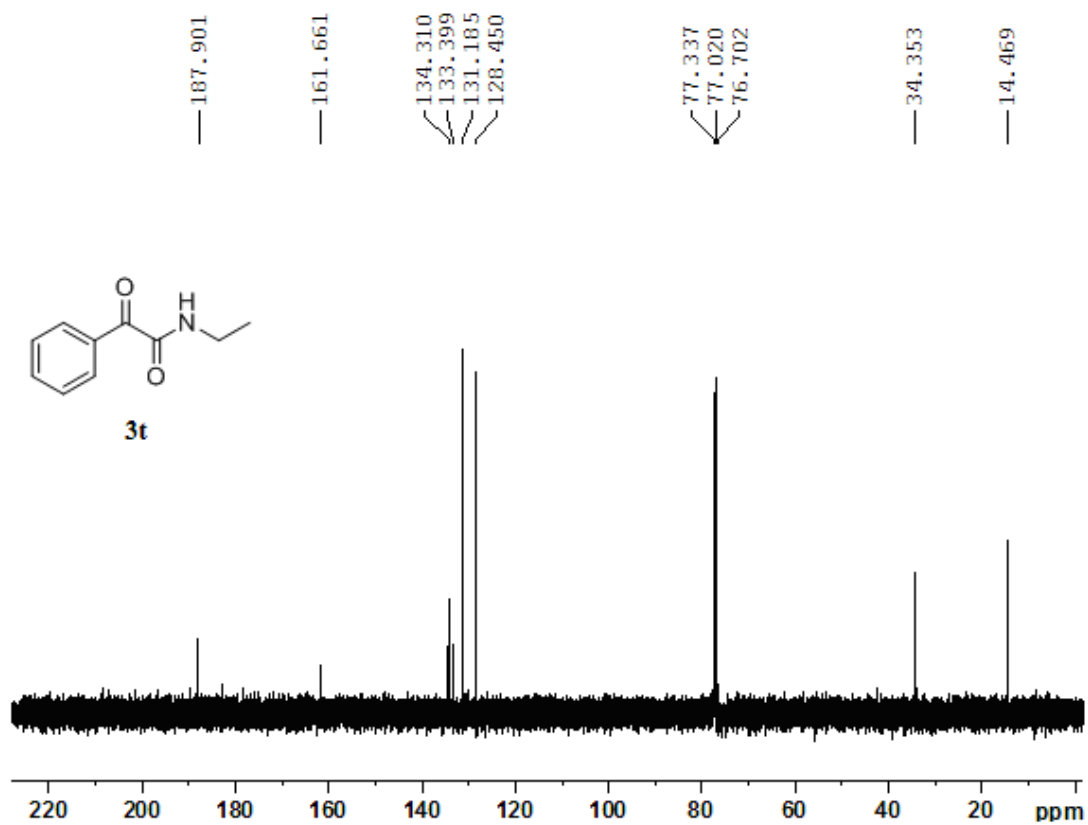

Supplement: c3ob27433k.pdf [file c3ob27433k.pdf]
